# Supplementary material
Source: PubMed Central journal article supplement (PMC8923367)
Supplement: str-53-0956-s001.pdf [file str-53-0956-s001.pdf]

## **SUPPLEMENTAL MATERIAL**

*Dosage, intensity and frequency of language therapy for aphasia; a systematic review based, individual participant data network meta-analysis.*

| <b>Table of Contents</b> |                                                                                                                                      | <b>Page</b> |
|--------------------------|--------------------------------------------------------------------------------------------------------------------------------------|-------------|
| Supplemental Table I     | Included randomised controlled trials; location, funding, participants, IPD, data timepoints                                         | 3           |
| Supplemental Table II    | Included SLT interventions by trial, treatment location, target, approach, provider, delivery, regimen, tailoring and home-practice. | 10          |
| Supplemental Table III   | Characteristics of included SLT interventions                                                                                        | 18          |
| Supplemental Table IV    | Cluster-effect analysis; p values for within-study clustering effect                                                                 | 19          |
| Supplemental Table V     | SLT rehabilitation by impairment target and language outcome                                                                         | 20          |
| Supplemental Table VI    | SLT theoretical approach by language outcome                                                                                         | 21          |
| Supplemental Table VII   | SLT Home-Practice by language domain                                                                                                 | 22          |
| Supplemental Table VIII  | Tailoring of SLT interventions (functional relevance and level of difficulty) by language domain                                     | 23          |
| Supplemental Table IX    | Trial group comparisons at baseline by age, sex, aphasia severity, time since stroke onset                                           | 24          |
| Supplemental Table X     | Year of publication and report of significant findings                                                                               | 26          |
| Supplemental Table XI    | Risk of bias and age of dataset                                                                                                      | 26          |
| Supplemental Table XII   | Wu-Hausman test for fixed versus random effects model                                                                                | 26          |
| Supplemental Table XIII  | Functional communication (observer-rated) data including TOMs participation data                                                     | 27          |

---

|                          |                                                                                                            |    |
|--------------------------|------------------------------------------------------------------------------------------------------------|----|
| Supplemental Table XIV   | Duplicate data, choice of data items and justification                                                     | 29 |
| Supplemental Table XV    | SLT frequency and goodness of fit to baseline, sex, age and time; model by language domain                 | 31 |
| Supplemental Table XVI   | SLT duration and goodness of fit to baseline, sex, age and time; model by language domain                  | 32 |
| Supplemental Table XVII  | SLT intensity and goodness of fit to baseline, sex, age, time since index stroke; model by language domain | 33 |
| Supplemental Table XVIII | SLT dosage and goodness of fit to baseline, sex, age and time; model by language domain                    | 34 |
| Supplemental Table XIX   | Trials including people with aphasia after stroke, but which did not inform our IPD network meta-analysis  | 35 |
| Supplemental Table XX    | Unavailable potentially eligible randomised controlled trial IPD                                           | 44 |
| Figure I                 | Data searching and identification                                                                          | 48 |
| Figure II                | SLT Frequency Networks (days per week)                                                                     | 49 |
| Figure III               | SLT Frequency (by days/weekly) and associated gains from baseline (mean; 95% CI)                           | 50 |
| Figure IV                | SLT Duration (total weeks) networks                                                                        | 52 |
| Figure V                 | Duration (weeks of SLT) and associated language gains from baseline (mean; 95% CI)                         | 53 |
| Figure VI                | Risk of bias by RCT dataset                                                                                | 55 |

---

**Table I. Included randomised controlled trials; location, funding, participants, IPD, data timepoints.**

| Primary Publication reference | Country         | Funder                                           | Participants inclusion and exclusion criteria                                                                                                                                                                                                                                                                                                                                                                                                                                            | IPD | IPD collection time-points contributing to RELEASE | Electronic or Public domain trial |
|-------------------------------|-----------------|--------------------------------------------------|------------------------------------------------------------------------------------------------------------------------------------------------------------------------------------------------------------------------------------------------------------------------------------------------------------------------------------------------------------------------------------------------------------------------------------------------------------------------------------------|-----|----------------------------------------------------|-----------------------------------|
| Ciccone (2015)                | Australia       | Unreported                                       | <p><u>Inclusion:</u> stroke (less than 5 days); aphasia (score below ceiling of WAB); teaching hospital admission; conscious and medically stable; can maintain alert state for at least 30 minutes</p> <p><u>Exclusion:</u> previous history of aphasia, mental illness or dementia; non-English speaking background; history of sub-arachnoid and / or subdural haemorrhage or neurosurgical intervention; uncorrected hearing or vision impairment</p> <p><u>In RELEASE:</u> n=20</p> | 20  | Baseline; 3 months; 6 months                       | Electronic                        |
| de Jon-Hagelstein (2011)      | The Netherlands | Stichting Nuts Ohra (T-07-71)                    | <p><u>Inclusion:</u> adult; stroke (less than 3 weeks); aphasia (verbal communication, semantic or phonological disorder, tests and cut-offs defined); life expectancy more than 6 months</p> <p><u>Exclusion:</u> over 85 years; severe dysarthria; premorbid dementia or aphasia; developmental dyslexia; visual perceptual disorder; recent psychiatric disorder</p> <p><u>In RELEASE:</u> n=85 (75 completed)</p>                                                                    | 85  | Baseline; 3 months; 6 months                       | Electronic                        |
| Doesborgh (2004a)             | The Netherlands | Netherlands organisation for Scientific Research | <p><u>Inclusion:</u> adult (age 20 to 86); stroke (at least 11 months); aphasia (moderate to severe naming deficit BNT); completed intensive impairment-oriented (semantic or phonological) therapy; native speaker (Dutch)</p> <p><u>Exclusion:</u> global or minimal aphasia; dysarthria; non-native Dutch speaker;</p>                                                                                                                                                                | 18  | Baseline; 2 months                                 | Electronic                        |

SUPPLEMENTAL MATERIAL - Dosage, intensity and frequency of therapy for aphasia

|                   |                 |                                                                                              |                                                                                                                                                                                                                                                                                                                                                                                                                                                                                                                                   |    |                                           |               |
|-------------------|-----------------|----------------------------------------------------------------------------------------------|-----------------------------------------------------------------------------------------------------------------------------------------------------------------------------------------------------------------------------------------------------------------------------------------------------------------------------------------------------------------------------------------------------------------------------------------------------------------------------------------------------------------------------------|----|-------------------------------------------|---------------|
|                   |                 |                                                                                              | illiteracy, developmental dyslexia, severe acquired dyslexia; visual perceptual deficit<br><u>In RELEASE:</u> n= 18                                                                                                                                                                                                                                                                                                                                                                                                               |    |                                           |               |
| Doesborgh (2004b) | The Netherlands | Netherlands Organization for Health Research and Development, Chronic Diseases (940-33- 008) | <u>Inclusion:</u> adult; stroke; aphasia (moderate or severe; both semantic and phonological deficit); one of 35 clinical centres; speech and language therapist considered a candidate for intensive treatment (taking into account practical, psychological, physical, cognitive factors);<br><u>Exclusion:</u> within 3 months of onset; dysarthria; global aphasia; recovered aphasia; non-native speaker; illiteracy; developmental dyslexia; severe acquired dyslexia; visual perceptual deficit<br><u>In RELEASE:</u> n=58 | 58 | Baseline; 11 months                       | Electronic    |
| Mattioli (2014)   | Italy           | Unreported                                                                                   | <u>Inclusion:</u> adult; stroke (first, acute); aphasia with mildly impaired comprehension; native speaker (Italian); suitable for MRI; right-handed; no other neurological or psychiatric disease; no hearing deficit<br><u>Exclusion:</u> over 80 years; stroke not in middle cerebral artery; aphasia with severely impaired comprehension; not native Italian speaker; unsuitable for MRI (pacemaker; claustrophobia; severe obesity); dementia; psychiatric disorders; deafness<br><u>In RELEASE:</u> n=12                   | 12 | Baseline; 16 days; 190 days               | Electronic    |
| Meikle (1979)     | UK              | Chest, Heart, and Stroke Association                                                         | <u>Inclusion:</u> stroke (at least 3 weeks); aphasia (less than 4 <sup>th</sup> percentile on PICA); previously proficient in English; well enough to attend                                                                                                                                                                                                                                                                                                                                                                      | 31 | Baseline; 4, 15, 24, 35, 42, 66, 84 weeks | Public domain |

SUPPLEMENTAL MATERIAL - Dosage, intensity and frequency of therapy for aphasia

|                 |           |                                                                                                                                                                                                                                                         |                                                                                                                                                                                                                                                                                                                                                                                                                                                                                                                                                 |                                       |                                               |               |
|-----------------|-----------|---------------------------------------------------------------------------------------------------------------------------------------------------------------------------------------------------------------------------------------------------------|-------------------------------------------------------------------------------------------------------------------------------------------------------------------------------------------------------------------------------------------------------------------------------------------------------------------------------------------------------------------------------------------------------------------------------------------------------------------------------------------------------------------------------------------------|---------------------------------------|-----------------------------------------------|---------------|
|                 |           |                                                                                                                                                                                                                                                         | <u>Exclusion:</u> dementia; lives too far from hospital<br><u>In RELEASE:</u> n= 31                                                                                                                                                                                                                                                                                                                                                                                                                                                             |                                       |                                               |               |
| Laska (2011)    | Sweden    | Stockholm County Council Foundation (Expo-95); AFA Insurances; Marianne and Marcus Wallenberg Foundation; Karolinska Institute                                                                                                                          | <u>Inclusion:</u> stroke (first); aphasia (NGA 0 to 59); able to start SLT within 2 days of onset<br><u>Exclusion:</u> rapid regression; dementia; drug abuse; severe illness; unable to participate in treatment (as judged by investigator)                                                                                                                                                                                                                                                                                                   | 125 (plus 2 without group allocation) | Baseline; 3 weeks (16 days); 6 months         | Electronic    |
| Rodriguez 2013  | Australia | National Health and Medical Rehabilitation Council (NHMRC) Centre for Clinical Research Excellence in Aphasia Rehabilitation (Grant # 569935); DC was funded by an Australia Research Council Future Fellowship and NHMRC Career Development Fellowship | <u>Inclusion:</u> stroke (at least 6 months); aphasia; no other neurological disorders; sufficient vision and hearing to take part<br><u>Exclusion:</u> concomitant neurological illness                                                                                                                                                                                                                                                                                                                                                        | = 11                                  | Baseline; 2 weeks; 4 weeks; 9 weeks; 11 weeks | Electronic    |
| Woodhead (2017) | UK        | Wellcome Trust and the James S McDonnell Foundation (conducted as part of the Brain Network Recovery Group initiative). APL and ST were supported by personal fellowships from the Wellcome Trust (ME033459MES and 106084/Z/14/Z, respectively).        | <u>Inclusion:</u> adult; stroke (3 or more months); aphasia (Wernicke's); competent to consent<br><u>Exclusion:</u> under 18; significant medical or psychiatric co-morbidity; unable to comply with treatment regime or scanning; significant multifocal cerebral disease; contraindications to cholinesterase inhibitors (sick sinus syndrome; pregnancy; lactation); contraindications to fMRI and MEG (pacemaker; noncompatible metallic implant); severe hearing impairment; unable to provide informed consent<br><u>In RELEASE:</u> n=20 | 20                                    | Baseline; 5 weeks; 10 weeks                   | Electronic    |
| Lincoln (1980a) | UK        | Unreported                                                                                                                                                                                                                                              | <u>Inclusion:</u> adult; stroke; no other brain damage; aphasia; referred for SLT by medical staff; able to attend daily (4 days per week) for 8 weeks as in- or out-patient                                                                                                                                                                                                                                                                                                                                                                    | 24                                    | Baseline; week 4; week 8                      | Public domain |

SUPPLEMENTAL MATERIAL - Dosage, intensity and frequency of therapy for aphasia

|                          |         |                                                                                                                                                                                             |                                                                                                                                                                                                                                                                                                                       |               |                                                                 |               |
|--------------------------|---------|---------------------------------------------------------------------------------------------------------------------------------------------------------------------------------------------|-----------------------------------------------------------------------------------------------------------------------------------------------------------------------------------------------------------------------------------------------------------------------------------------------------------------------|---------------|-----------------------------------------------------------------|---------------|
| Lincoln (1980b)          | UK      | Unreported                                                                                                                                                                                  | <p><u>Exclusion:</u> severely or mildly aphasic</p> <p><u>Inclusion:</u> adult; stroke; no other brain damage; severe aphasia; referred for SLT by medical staff; able to attend daily (4 days per week) for 8 weeks as in- or out-patient</p> <p><u>Exclusion:</u> unreported</p> <p><u>In RELEASE:</u> n=24</p>     | 24            | Baseline; week 4; week 8                                        | Public domain |
| Szaflarski (2015)        | USA     | NINDS R01 NS 048281 and by NIH/NCRR UL1-RR026314 (REDCap Database)                                                                                                                          | <p><u>Inclusion:</u> stroke (single); aphasia (chronic)</p> <p><u>Exclusion:</u> more than one stroke; history degenerative or metabolic disorder or supervening illness; history depression or other mental illness; pregnant</p> <p><u>In RELEASE:</u> n=24</p>                                                     | 24            | Baseline; 2 weeks; 12 weeks                                     | Electronic    |
| Palmer (2012)            | UK      | NIHR Research for Patient Benefit (RfPB) Programme (Grant Reference Number PB-PG-1207-14097)                                                                                                | <p><u>Inclusion:</u> stroke; aphasia (predominant word-finding difficulties; able to repeat spoken words); ceased impairment-focused SLT; motor deficits if co-existing; upper limb impairment if computer access addressed by assistive devices</p> <p><u>Exclusion:</u> severe visual or cognitive difficulties</p> | 34            | Baseline; 5 months; 8 months                                    | Electronic    |
| Smania (2006) and (2000) | Italy   | Ministero Italiano Universita' Ricerca and Finanziamento Italiano Ricerca di Base (FIRB) both awarded to Salvatore M. Aglioti; M.U.R.S.T. and the Consiglio Nazionale delle Ricerche, Italy | <p><u>Inclusion:</u> stroke; aphasia; limb apraxia (ideational or ideomotor) for at least 2 months</p> <p><u>Exclusion:</u> history of stroke or other neurological disorders; over 80 years; uncooperativeness; orthopedic or other disabling disorders</p> <p><u>In RELEASE:</u> n=32</p>                           | 32            | Baseline; 10 weeks                                              | Electronic    |
| Breitenstein (2017)      | Germany | German Federal Ministry of Education and Research (BMBF); German Society for Aphasia Research and Treatment (GAB)                                                                           | <p><u>Inclusion:</u> adult; stroke; aphasia for at least 6 months; native speaker (German); at least basic level of communication and language comprehension</p>                                                                                                                                                      | 142 (minus14) | Screening; baseline; 3 weeks; 6 weeks (subgroup only); 6 months | Electronic    |

SUPPLEMENTAL MATERIAL - Dosage, intensity and frequency of therapy for aphasia

|                        |           |                  |                                                                                                                                                                                                                                                                                                                                                                                                                                                                                                           |    |                                                                                               |
|------------------------|-----------|------------------|-----------------------------------------------------------------------------------------------------------------------------------------------------------------------------------------------------------------------------------------------------------------------------------------------------------------------------------------------------------------------------------------------------------------------------------------------------------------------------------------------------------|----|-----------------------------------------------------------------------------------------------|
|                        |           |                  | <p><u>Exclusion:</u> severe untreated medical conditions; severe uncorrected vision or hearing impairments; aphasia from traumatic brain injury or neurodegenerative disease; participation in any intensive stroke intervention in previous 4 weeks</p> <p><u>Not in RELEASE:</u> 14</p> <p><u>In RELEASE:</u> n=142</p>                                                                                                                                                                                 |    |                                                                                               |
| Godecke (2012)         | Australia | Unfunded project | <p><u>Inclusion:</u> stroke (acute); aphasia (less than 5 days; score of 13 or less on FAST); admitted to teaching hospital; conscious, medically stable, able to maintain alertness for at least 30 minutes</p> <p><u>Exclusion:</u> previous history subarachnoid/subdural haemorrhage, neurosurgical intervention, aphasia, mental illness, dementia; non-English speaking; uncorrected hearing or vision impairment; already 3 participants in daily therapy group</p> <p><u>In RELEASE:</u> n=59</p> | 59 | <p>Baseline; 4 weeks (or acute hospital discharge if sooner); 6 months</p> <p>Electronic</p>  |
| Kukkonen (unpublished) | Finland   | None             | <p><u>Inclusion:</u> older adult (50-64; 65-80); stroke (first); aphasia; right-handed; living in Tampere with someone; no dementia; normal hearing and vision</p> <p><u>Exclusion:</u> age under 50; two or more, right hemisphere, or haemorrhagic stroke; dementia or other neurological disease; left-handed; living alone; living outside Tampere; problems with hearing or vision</p>                                                                                                               | 36 | <p>Baseline; 4 weeks; 10 weeks; 14 weeks; 20 weeks; 32 weeks; 56 weeks</p> <p>Unpublished</p> |
| Martins (2013)         | Portugal  | None reported    | <p><u>Inclusion:</u> adult (40-80); stroke (single); aphasia (LAAB mild/moderate and severe); native</p>                                                                                                                                                                                                                                                                                                                                                                                                  | 30 | <p>Baseline; 10 weeks; 50 weeks; 62 weeks</p> <p>Electronic</p>                               |

SUPPLEMENTAL MATERIAL - Dosage, intensity and frequency of therapy for aphasia

|                       |                 |                                                                                                                         |                                                                                                                                                                                                                                                                                                                                                                                                               |    |                                      |            |
|-----------------------|-----------------|-------------------------------------------------------------------------------------------------------------------------|---------------------------------------------------------------------------------------------------------------------------------------------------------------------------------------------------------------------------------------------------------------------------------------------------------------------------------------------------------------------------------------------------------------|----|--------------------------------------|------------|
|                       |                 |                                                                                                                         | <p>speaker (Portuguese); willing to participate</p> <p><u>Exclusion:</u> more than 3 months since stroke or further stroke; very severe or very mild aphasia; illiteracy; unable to attend on daily basis; evidence of dementia or other severe medical or psychiatric disorder; miss more than 5 consecutive hours of intervention</p> <p><u>In RELEASE:</u> 30 at baseline; 14 at completion (62 weeks)</p> |    |                                      |            |
| Meinzer (2007)        | Germany         | Deutsche Forschungsgemeinschaft (DFG, Grant RO 805011-4) and the Kuratorium Zentrales Nervensystem (ZNS, Grant 2001013) | <p><u>Inclusion:</u> stroke (single); aphasia (at least 6 months; global aphasia if residual expressive language); 1 or more participating relative</p> <p><u>Exclusion:</u> well-recovered people with minimal aphasia symptoms</p> <p><u>In RELEASE:</u> n=20</p>                                                                                                                                           | 20 | Baseline; 10 days                    | Electronic |
| Khedr (2014)          | Egypt           | Unreported                                                                                                              | <p><u>Inclusion:</u> stroke (single); aphasia (non-fluent); subacute hemiplegia</p> <p><u>Exclusion:</u> head injury or neurological disease other than stroke; unstable cardiac dysrhythmia; fever; infection; hyperglycemia; prior administration of tranquiliser; safety contraindications for rTMS</p> <p><u>In RELEASE:</u> n=29</p>                                                                     | 29 | Baseline; 2 weeks; 6 weeks; 10 weeks | Electronic |
| van der Meulen (2016) | The Netherlands | Stichting Rotterdams Kinderrevalidatie Fonds Adriaanstichting (grant no. 2007/0168 JKF/07.08.31 KFA).                   | <p><u>Inclusion:</u> adult; stroke (more than 1 year); aphasia (candidate for MIT: non-fluent; poor language repetition; poorly articulated speech; moderate to good auditory comprehension)</p> <p><u>Exclusion:</u> prior stroke resulting in aphasia; bilateral lesion; intensive MIT prior to start of study; severe hearing deficit; relevant psychiatric history</p> <p><u>In RELEASE:</u> n=17</p>     | 17 | Baseline; 42 days; 82 days           | Electronic |



SUPPLEMENTAL MATERIAL - Dosage, intensity and frequency of therapy for aphasia

|                     |         |                                                                                                                                                                                                                                                                                                                                                                                                 |                                                                                                                                                                                                                                                                                                                                                                                                                      |    |                              |               |
|---------------------|---------|-------------------------------------------------------------------------------------------------------------------------------------------------------------------------------------------------------------------------------------------------------------------------------------------------------------------------------------------------------------------------------------------------|----------------------------------------------------------------------------------------------------------------------------------------------------------------------------------------------------------------------------------------------------------------------------------------------------------------------------------------------------------------------------------------------------------------------|----|------------------------------|---------------|
| Rubi-Fessen (2015)  | Germany | Walter and Marga Boll Foundation and the Wolf-Dieter Heiss-Foundation.                                                                                                                                                                                                                                                                                                                          | <p><u>Inclusion:</u> 55 to 85 years; stroke (first; up to 16 weeks); aphasia; first language (German); right-handed</p> <p><u>Exclusion:</u> previous stroke, neurodegenerative or psychiatric disease; epilepsy; auditory or visual deficits that might impair testing</p> <p><u>In RELEASE:</u> n=30</p>                                                                                                           | 30 | Baseline; 2 weeks            | Electronic    |
| Efstratiadou (2019) | Greece  | Co-financed by the European Union (European Social Fund—ESF) EFSA aphasia therapy and Greek national funds through the Operational Program ‘Education and Lifelong Learning’ of the National Strategic Reference Framework (NSRF)—Research Funding Program: THALES UOA—Levels of Impairment in Greek Aphasia: Relationship with Processing Deficits, Brain Region, and Therapeutic Implications | <p><u>Inclusion:</u> adult; stroke (at least 4 months); aphasia; native speaker (Greek); medically stable; no other neurological or psychiatric history; no considerable cognitive impairment</p> <p><u>Exclusion:</u> in receipt of other SLT during the project; not living independently at home prior to the stroke</p> <p><u>Not in RELEASE:</u> 20 received alternative SLT</p> <p><u>In RELEASE:</u> n=38</p> | 38 | Baseline; 19 weeks; 32 weeks | Electronic    |
| You (2011)          | Korea   | Unreported                                                                                                                                                                                                                                                                                                                                                                                      | <p><u>Inclusion:</u> stroke; not taking pharmacological drugs</p> <p><u>Exclusion:</u> history of previous stroke, seizure, multiple stroke lesions; metal implants in brain; taking certain medication; uncooperative with SLT</p> <p><u>In RELEASE:</u> n=21</p>                                                                                                                                                   | 21 | Baseline; 2 weeks            | Public domain |

IPD Individual participant data

**Table II. Included SLT interventions by trial, treatment location, target, approach, provider, delivery, regimen, tailoring and home-practice.**

| Primary Publication reference | Treatment location                                                                           | Group                                      | SLT Impairment Target:              | SLT Theoretical Approach: | Provided by:                  | Delivery:                       | Regimen:                                                                                                                                                                                                      | Tailoring:              | Home-practice prescribed: |
|-------------------------------|----------------------------------------------------------------------------------------------|--------------------------------------------|-------------------------------------|---------------------------|-------------------------------|---------------------------------|---------------------------------------------------------------------------------------------------------------------------------------------------------------------------------------------------------------|-------------------------|---------------------------|
| <b>Mattioli (2014)</b>        | Hospital, then outpatient                                                                    | <b>Group 1:</b> n=6                        | Mixed SLT and Word Finding SLT      | Unreported                | Speech and language therapist | Face-to-face; 1-to-1            | <u>Frequency:</u> 5 days per week. <u>Duration:</u> 2 months. <u>Intensity:</u> 5 hours. <u>Dosage:</u> 10 hours.                                                                                             | Unreported              | Unreported                |
|                               |                                                                                              | <b>Group 2:</b> n=6                        | No SLT                              |                           |                               |                                 |                                                                                                                                                                                                               |                         |                           |
| <b>Meikle (1979)</b>          | Home and groups at rehabilitation centre                                                     | <b>Group 1:</b> n=16<br>"Conventional SLT" | Unreported                          | Unreported                | Speech and language therapist | face-to-face; 1-to-1 and group; | <u>Frequency:</u> 3-5 days per week. <u>Duration:</u> IPD. <u>Intensity:</u> between 2 hours 15 minutes and 3 hours 45 minutes. <u>Dosage:</u> IPD                                                            | Unreported              | Unreported                |
|                               |                                                                                              | <b>Group 2:</b> n=15<br>"Conventional SLT" | Mixed SLT                           | Unreported                | recruited volunteers.         | face-to-face; 1-to-1 and group; | <u>Frequency:</u> 4 home visits per week and a separate group session at rehabilitation centre. <u>Duration:</u> IPD. <u>Intensity:</u> between 2 hours 15 minutes and 3 hours 45 minutes. <u>Dosage:</u> IPD | By difficulty           | Unreported                |
| <b>Laska (2011)</b>           | Stroke unit, or discharged to (home, rehabilitation clinic, geriatric clinic, nursing home). | <b>Group 1:</b> n=62                       | Mixed SLT                           | Unreported                | Speech and language therapist | Face-to-face; 1-to-1            | <u>Frequency:</u> 3 sessions each day 5 days per week. <u>Duration:</u> 3 weeks. <u>Intensity:</u> 3 hours 45 minutes. <u>Dosage:</u> 11 hours 15 minutes.                                                    | By functional relevance | Unreported                |
|                               |                                                                                              | <b>Group 2:</b> n=61                       | <u>Intervention type(s):</u> No SLT |                           |                               |                                 |                                                                                                                                                                                                               |                         |                           |

SUPPLEMENTAL MATERIAL - Dosage, intensity and frequency of therapy for aphasia

|                         |                                                  |                                                                                                                                                                                                 |                                |                                                            |                                              |                                                              |                                                                                                                                                                                                                                 |                                        |            |
|-------------------------|--------------------------------------------------|-------------------------------------------------------------------------------------------------------------------------------------------------------------------------------------------------|--------------------------------|------------------------------------------------------------|----------------------------------------------|--------------------------------------------------------------|---------------------------------------------------------------------------------------------------------------------------------------------------------------------------------------------------------------------------------|----------------------------------------|------------|
| <b>Rodriguez (2013)</b> | Aphasia clinic and other rehabilitation centres. | <b>Group 1:</b> n=4                                                                                                                                                                             | Word Finding SLT and Mixed SLT | Functional or Pragmatic SLT; Semantic and Phonological SLT | speech and language therapists and students. | face-to-face; 1-to-1 and group;                              | <u>Frequency:</u> 5 days per week. <u>Duration:</u> 2 weeks. <u>Intensity:</u> 20 hours. <u>Dosage:</u> 40 hours.                                                                                                               | By functional relevance and difficulty | Yes        |
|                         |                                                  | <b>Group 2:</b> n=7                                                                                                                                                                             | Word Finding SLT and Mixed SLT | Functional or Pragmatic SLT; Semantic and Phonological SLT | speech and language therapists and students. | face-to-face and computer-based treatment; 2-to-1 and group; | <u>Frequency:</u> 5 days each week. <u>Duration:</u> 4 weeks. <u>Intensity:</u> 25 hours. <u>Dosage:</u> 100 hours.                                                                                                             | By functional relevance and difficulty | Yes        |
| <b>Woodhead (2017)</b>  | Home                                             | <b>Group 1:</b> n=14<br><u>Intervention type(s):</u> SLT intervention                                                                                                                           | Auditory Comprehension SLT     | Phonological SLT plus Co-intervention (Donepezil)          | experimental psychologist.                   | computer-based; self-managed;                                | <u>Frequency:</u> 7 days a week. <u>Duration:</u> 25 weeks in study, but intervention is over two 5-week blocks. <u>Intensity:</u> 7.3 hours (according to diaries) on average. <u>Dosage:</u> 73 hours (according to diaries). | By difficulty                          | Yes        |
|                         |                                                  | <b>Group 2:</b> n=13<br><u>Intervention type(s):</u> SLT intervention<br><u>Delivery:</u><br><u>Location:</u><br><u>Regimen:</u> 10 hours of training per week over each 5 week training block. | Auditory Comprehension SLT     | Phonological SLT plus Co-intervention (placebo)            | experimental psychologist                    | computer-based; self-managed;                                | <u>Frequency:</u> 7 days a week. <u>Duration:</u> 25 weeks in study, but intervention is over two 5-week blocks. <u>Intensity:</u> 7.3 hours (according to diaries) on average. <u>Dosage:</u> 73 hours (according to diaries). | By difficulty                          | Yes        |
| <b>Lincoln (1980a)</b>  | Hospital and home                                | <b>Group 1:</b> 6                                                                                                                                                                               | Mixed SLT                      | Unreported                                                 | Speech and language therapist                | Face-to-face; 1-to-1                                         | <u>Frequency:</u> 4 days per week. <u>Duration:</u> 3.5 weeks. <u>Intensity:</u> 2 hours. <u>Dosage:</u> 7 hours.                                                                                                               | Unreported                             | Unreported |
|                         |                                                  | <b>Group 2:</b> 7<br>No SLT (operant training) then                                                                                                                                             | Mixed SLT                      | Unreported                                                 | Speech and language therapist                | Face-to-face; 1-to-1                                         | hospital and home<br><u>Frequency:</u> 4 days per week. <u>Duration:</u>                                                                                                                                                        | Unreported                             | Unreported |

SUPPLEMENTAL MATERIAL - Dosage, intensity and frequency of therapy for aphasia

|                   |          |                                                                                                                                                                                                                                 |                                                                   |                                    |                                                |                                 |                                                                                                                                             |               |            |
|-------------------|----------|---------------------------------------------------------------------------------------------------------------------------------------------------------------------------------------------------------------------------------|-------------------------------------------------------------------|------------------------------------|------------------------------------------------|---------------------------------|---------------------------------------------------------------------------------------------------------------------------------------------|---------------|------------|
|                   |          | Conventional SLT                                                                                                                                                                                                                |                                                                   |                                    |                                                |                                 | 3.5 weeks. <u>Intensity:</u> 2 hours. <u>Dosage:</u> 7 hours.                                                                               |               |            |
|                   |          | <b>Group 3:</b> n=5<br><u>Intervention type(s):</u> Social Support then Conventional SLT                                                                                                                                        | Mixed SLT                                                         | Unreported                         | Speech and language therapist                  | Face-to-face; 1-to-1            | <u>Frequency:</u> 4 days per week. <u>Duration:</u> 3.5 weeks. <u>Intensity:</u> 2 hours. <u>Dosage:</u> 7 hours.                           | Unreported    | Unreported |
|                   |          | <b>Group 4:</b> n=6                                                                                                                                                                                                             | Mixed SLT                                                         | Unreported                         | Speech and language therapist                  | Face-to-face; 1-to-1            | <u>Frequency:</u> 4 days per week. <u>Duration:</u> 3.5 weeks. <u>Intensity:</u> 2 hours. <u>Dosage:</u> 7 hours.                           | Unreported    | Unreported |
| Lincoln (1980b)   | Hospital | <b>Group 1:</b> n=12                                                                                                                                                                                                            | Operant training with SLT then Social Support with SLT            | Mixed SLT                          | Speech and language therapist and psychologist | Face-to-face; 1-to-1            | <u>Frequency:</u> IPD between 1.25 and 3.5 days per week. <u>Duration:</u> 8 weeks. <u>Intensity:</u> 2 hours per week. <u>Dosage:</u> IPD. | By difficulty | Unreported |
|                   |          | <b>Group 2:</b> n=12                                                                                                                                                                                                            | SLT with Social Support, then operant training with SLT Mixed SLT | Unreported                         | Speech and language therapist and psychologist | Face-to-face; 1-to-1            | <u>Frequency:</u> IPD between 1.25 and 3.5 days per week. <u>Duration:</u> 8 weeks. <u>Intensity:</u> 2 hours per week. <u>Dosage:</u> IPD  | By difficulty | Unreported |
| Szaflarski (2015) | Hospital | <b>Group 1:</b> n=14<br><u>Intervention type(s):</u> SLT intervention<br><u>SLT Impairment Target:</u><br><u>SLT Theoretical Approach:</u><br><u>Provided by:</u><br><u>Delivery:</u><br><u>Location:</u><br><u>Regimen:</u> 10 | Word-finding SLT; Spoken Language SLT                             | Constraint Induced Aphasia Therapy | Speech and language therapist                  | face-to-face; groups of 3 to 4; | <u>Frequency:</u> 5 times per week; <u>Duration:</u> 2 weeks; <u>Intensity:</u> 20 hours. <u>Dosage:</u> 40 hours.                          | By difficulty | Unreported |

SUPPLEMENTAL MATERIAL - Dosage, intensity and frequency of therapy for aphasia

|                                 |                                         |                       |                                                                 |                               |                                                                                         |                                                               |                                                                                                                                                                                      |                                        |                                                            |
|---------------------------------|-----------------------------------------|-----------------------|-----------------------------------------------------------------|-------------------------------|-----------------------------------------------------------------------------------------|---------------------------------------------------------------|--------------------------------------------------------------------------------------------------------------------------------------------------------------------------------------|----------------------------------------|------------------------------------------------------------|
|                                 |                                         |                       |                                                                 |                               |                                                                                         |                                                               |                                                                                                                                                                                      |                                        | daily sessions 4 hours per day for 10 consecutive weekdays |
|                                 |                                         | <b>Group 2:</b> n=10  | <u>Intervention type(s):</u> No SLT                             |                               |                                                                                         |                                                               |                                                                                                                                                                                      |                                        |                                                            |
| <b>Palmer (2012)</b>            |                                         | <b>Group 1:</b> n=16  | Word-finding SLT and Mixed SLT                                  | Unreported                    | Self-managed, computer software, supported by speech and language therapist, volunteer. | Home visit plus computer or phone call plus computer; 1-to-1; | <u>Frequency:</u> IPD.<br><u>Duration:</u> 5 months.<br><u>Intensity:</u> IPD.<br><u>Dosage:</u> IPD                                                                                 | By functional relevance                | Unreported                                                 |
|                                 |                                         | <b>Group 2:</b> n=17  | <u>Intervention type(s):</u> No SLT                             |                               |                                                                                         |                                                               |                                                                                                                                                                                      |                                        |                                                            |
|                                 |                                         | <b>Group 1:</b> n=17  | <u>Intervention type(s):</u> No SLT (limb apraxia therapy only) |                               |                                                                                         |                                                               |                                                                                                                                                                                      |                                        |                                                            |
| <b>Smania (2006) and (2000)</b> | Therapy clinic                          | <b>Group 2:</b> n= 15 | unreported                                                      | unreported                    | Speech and language therapist                                                           | unreported;                                                   | <u>Frequency:</u> 3 days per week.<br><u>Duration:</u> 10 weeks.<br><u>Intensity:</u> 2.5 hours.<br><u>Dosage:</u> 25 hours.                                                         | Unreported                             | Unreported                                                 |
| <b>Breitenstein (2017)</b>      | Inpatient and outpatient rehabilitation | <b>Group 1:</b> N=78  | Mixed SLT                                                       | Functional or Pragmatic SLT   | Speech and language therapist                                                           | face-to-face; 1-to-1 and group                                | <u>Frequency:</u> IPD.<br><u>Duration:</u> IPD.<br><u>Intensity:</u> IPD.<br><u>Dosage:</u> IPD.                                                                                     | By difficulty                          | Yes                                                        |
|                                 | Outpatient                              | <b>Group 2:</b> n=78  | Unreported (usual care)                                         | Unreported                    | Speech and language therapist                                                           | face-to-face; 1-to-1 and group                                | <u>Frequency:</u> IPD.<br><u>Duration:</u> 3 weeks<br><u>Intensity:</u> IPD.<br><u>Dosage:</u> IPD.                                                                                  | Unreported                             | Unreported                                                 |
| <b>Godecke (2012)</b>           | Hospital or rehabilitation              | <b>Group 1:</b> n=32  | Spoken language SLT                                             | Semantic and Phonological SLT | Speech and language therapist                                                           | Face-to-face; 1-to-1                                          | <u>Frequency:</u> 5 days per week. <u>Duration:</u> IPD but maximum of 1 month.<br><u>Intensity:</u> IPD between 2.5 and 7.5 hours per week.<br><u>Dosage:</u> IPD up to 26.5 hours. | By functional relevance and difficulty | Unreported                                                 |
|                                 |                                         | <b>Group 2:</b> n=27  | Spoken Language SLT                                             | Semantic and Phonological SLT | Speech and language therapist                                                           | Face-to-face; 1-to-1                                          | <u>Frequency:</u> 1 day per week. <u>Duration:</u> IPD up to 1 month.                                                                                                                | By functional relevance                | Unreported                                                 |

SUPPLEMENTAL MATERIAL - Dosage, intensity and frequency of therapy for aphasia

|                               |                                                                                        |                      |                                                                                                  |                                                                    |                               |                                                                                    |                                                                                                                                    |                                        |            |
|-------------------------------|----------------------------------------------------------------------------------------|----------------------|--------------------------------------------------------------------------------------------------|--------------------------------------------------------------------|-------------------------------|------------------------------------------------------------------------------------|------------------------------------------------------------------------------------------------------------------------------------|----------------------------------------|------------|
|                               |                                                                                        |                      |                                                                                                  |                                                                    |                               | <u>Intensity:</u> up to 1.5 hours per week.<br><u>Dosage:</u> IPD up to 5.3 hours. | and difficulty                                                                                                                     |                                        |            |
| <b>Ciccone (2015)*</b>        | Hospital, rehabilitation or home                                                       | <b>Group 1:</b> n=8  | Word Finding SLT                                                                                 | Phonological and Semantic SLT                                      | Speech and language therapist | Face-to-face; 1-to-1                                                               | <u>Frequency:</u> IPD.<br><u>Duration:</u> 5 weeks.<br><u>Intensity:</u> IPD.<br><u>Dosage:</u> IPD.                               | By functional relevance and difficulty | Unreported |
|                               |                                                                                        | <b>Group 2:</b> n=12 | Word Finding SLT                                                                                 | Phonological and Semantic SLT; Constraint Induced Aphasia Therapy. | Speech and language therapist | face-to-face; group;                                                               | <u>Frequency:</u> IPD.<br><u>Duration:</u> 5 weeks.<br><u>Intensity:</u> IPD.<br><u>Dosage:</u> IPD.                               | By functional relevance and difficulty | Unreported |
| <b>Kukkonen (unpublished)</b> | SLT clinic                                                                             | <b>Group 1:</b> n=9  | Mixed SLT                                                                                        | Language Enrichment Therapy                                        | Speech and language therapist | Face-to-face; 1-to-1                                                               | <u>Frequency:</u> 5 days per week. <u>Duration:</u> 6 weeks + 6 weeks.<br><u>Intensity:</u> 10 hours.<br><u>Dosage:</u> 120 hours. | By functional relevance                | Unreported |
|                               |                                                                                        | <b>Group 2:</b> n=8  | Mixed SLT                                                                                        | Language Enrichment Therapy                                        | Speech and language therapist | Face-to-face; 1-to-1                                                               | <u>Frequency:</u> 2 days per week. <u>Duration:</u> 6 weeks + 6 weeks.<br><u>Intensity:</u> 2 hours.<br><u>Dosage:</u> 48 hours    | By functional relevance                | Unreported |
|                               |                                                                                        | <b>Group 3:</b> n=10 | Mixed SLT                                                                                        | Language Enrichment Therapy                                        | Speech and language therapist | Face-to-face; 1-to-1                                                               | <u>Frequency:</u> 1 day per week. <u>Duration:</u> 6 weeks + 6 weeks.<br><u>Intensity:</u> 1 hour.<br><u>Dosage:</u> 24 hours.     | By functional relevance                | Unreported |
|                               |                                                                                        | <b>Group 4:</b> n=9  | Spouses or caregiver(s) received support and information from the speech and language therapists |                                                                    |                               |                                                                                    | Twice, 1 hour per meeting                                                                                                          |                                        |            |
| <b>Martins (2013)</b>         | Medical and rehabilitation centres, outpatient rehabilitation unit, acute stroke unit. | <b>Group 1:</b> n=15 | Mixed SLT                                                                                        | Multimodal                                                         | Speech and language therapist | Face-to-face; 1-to-1                                                               | <u>Frequency:</u> 5 days per week. <u>Duration:</u> 10 weeks. <u>Intensity:</u> 10 hours. <u>Dosage:</u> 100 hours.                | By functional relevance and difficulty | Yes        |
|                               |                                                                                        | <b>Group 2:</b> n=15 | Mixed SLT                                                                                        | Multimodal Stimulation Approach (MSA) (Duffy 2001)                 | Speech and language therapist | Face-to-face; 1-to-1                                                               | <u>Frequency:</u> 1 day per week. <u>Duration:</u> 50 weeks. <u>Intensity:</u> 2 hours. <u>Dosage:</u> 100 hours.                  | By functional relevance and difficulty | Yes        |

SUPPLEMENTAL MATERIAL - Dosage, intensity and frequency of therapy for aphasia

|                                 |                                                      |                      |                  |                                    |                                                   |                                                  |                                                                                                                                                                    |                                        |            |
|---------------------------------|------------------------------------------------------|----------------------|------------------|------------------------------------|---------------------------------------------------|--------------------------------------------------|--------------------------------------------------------------------------------------------------------------------------------------------------------------------|----------------------------------------|------------|
| <b>Meinzer (2007)</b>           | Unreported                                           | <b>Group 1:</b> n=10 | Word Finding SLT | Constraint Induced Aphasia Therapy | trained psychologists                             | Face-to-face; group                              | <u>Frequency:</u> 5 days per week. <u>Duration:</u> 10 days. <u>Intensity:</u> 15 hours. <u>Dosage:</u> 30 hours.                                                  | By functional relevance and difficulty | Yes        |
|                                 |                                                      | <b>Group 2:</b> n=10 | Word Finding SLT | Constraint Induced Aphasia Therapy | Volunteer relatives with training and supervision | Face-to-face; group                              | <u>Frequency:</u> 5 days per week. <u>Duration:</u> 10 days. <u>Intensity:</u> 15 hours. <u>Dosage:</u> 30 hours.                                                  | By functional relevance and difficulty | Yes        |
| <b>Doesborgh (2004a)</b>        | Unreported                                           | <b>Group 1:</b> n=8  | Word Finding SLT | Unreported                         | Speech and language therapist                     | Computer, supervised by therapist; self-managed; | <u>Frequency:</u> 2 days per week. <u>Duration:</u> 2 months. <u>Intensity:</u> 1 to 1.5 hours weekly. <u>Dosage:</u> 10 to 11 hours.                              | By difficulty                          | Unreported |
|                                 |                                                      | <b>Group 2:</b> n=10 | No SLT           |                                    |                                                   |                                                  |                                                                                                                                                                    |                                        |            |
| <b>Khedr (2014)</b>             | Hospital                                             | <b>Group 1:</b> n=10 | Mixed SLT        | Unreported                         | Speech and language therapist                     | Face-to-face; 1-to-1                             | <u>Frequency:</u> 5 days per week. <u>Duration:</u> 2 weeks. <u>Intensity:</u> 2.5 hours. <u>Dosage:</u> 5 hours.                                                  | By difficulty                          | Unreported |
|                                 |                                                      | <b>Group 2:</b> n=19 | Mixed SLT        | Unreported                         | Speech and language therapist                     | Face-to-face; 1-to-1                             | <u>Frequency:</u> 5 days per week. <u>Duration:</u> 2 weeks. <u>Intensity:</u> 2.5 hours. <u>Dosage:</u> 5 hours.                                                  | By difficulty                          | Unreported |
| <b>de Jon-Hagelstein (2011)</b> | Hospital, rehabilitation clinic, home, nursing home. | <b>Group 1:</b> n=41 | Unreported       | Semantic and Phonological SLT      | Speech and language therapist                     | Face-to-face; 1-to-1                             | <u>Frequency:</u> 3.25 times per week on average. <u>Duration:</u> 6 months (or less if fully recovered). <u>Intensity:</u> 2 to 5 hours. <u>Dosage:</u> 52 hours. | By difficulty                          | Yes        |
|                                 |                                                      | <b>Group 2:</b> n=44 | Unreported       | Functional or Pragmatic SLT        | Speech and language therapist                     | Face-to-face; 1-to-1                             | <u>Frequency:</u> 3.25 times per week on average. <u>Duration:</u> 6 months (or less if fully recovered).                                                          | By difficulty                          | Yes        |

SUPPLEMENTAL MATERIAL - Dosage, intensity and frequency of therapy for aphasia

|                              |                                                                      |                                                 |                            |                                                                                                                                                                         |                                 |                                    |                                                                                                                                                 |                                        |            |
|------------------------------|----------------------------------------------------------------------|-------------------------------------------------|----------------------------|-------------------------------------------------------------------------------------------------------------------------------------------------------------------------|---------------------------------|------------------------------------|-------------------------------------------------------------------------------------------------------------------------------------------------|----------------------------------------|------------|
|                              |                                                                      |                                                 |                            |                                                                                                                                                                         |                                 |                                    | <u>Intensity:</u> 2 to 5 hours. <u>Dosage:</u> 52 hours.                                                                                        |                                        |            |
| <b>Doesborgh (2004b)</b>     | Hospital / rehabilitation clinic / home / nursing home.              | <b>Group 1:</b> n=29                            | Word Finding SLT           | Semantic SLT                                                                                                                                                            | Speech and language therapist   | Face-to-face and computer; 1-to-1; | <u>Frequency:</u> 2.25 days a week on average. <u>Duration:</u> 40 weeks. <u>Intensity:</u> 1.5 to 3 hours. <u>Dosage:</u> 40 to 60 hours.      | By difficulty                          | Yes        |
|                              |                                                                      | <b>Group 2:</b> n=29                            | Word Finding SLT           | Phonological SLT                                                                                                                                                        | Speech and language therapist   | Face-to-face and computer; 1-to-1; | <u>Frequency:</u> 2.25 days a week on average. <u>Duration:</u> 40 weeks. <u>Intensity:</u> 1.5 to 3 hours. <u>Dosage:</u> 40 to 60 hours.      | By difficulty                          | Yes        |
| <b>van der Meulen (2016)</b> | Rehabilitation / aphasia centres.                                    | <b>Group 1:</b> n=10                            | Spoken language SLT        | Melodic Intonation Therapy                                                                                                                                              | Speech and language therapist   | Face-to-face; 1-to-1               | <u>Frequency:</u> 5 days a week. <u>Duration:</u> 12 weeks (6 MIT and 6 no therapy). <u>Intensity:</u> 5 hours a week. <u>Dosage:</u> 30 hours. | By functional relevance and difficulty | Yes        |
|                              | Rehabilitation centre / nursing home with rehabilitation facilities. | <b>Group 2:</b> n=7                             | Auditory Comprehension SLT | unreported (protocol of what was and was not permitted, and manual of practice materials and references; PI helped create tailor-made tasks for a specific participant) | speech and language therapists. | Face-to-face; 1-to-1               | <u>Frequency:</u> 5 days a week. <u>Duration:</u> 6 weeks. <u>Intensity:</u> 5 hours a week. <u>Dosage:</u> 30 hours.                           | By functional relevance and difficulty | Unreported |
| <b>Rubi-Fessen (2015)</b>    | Hospital                                                             | <b>Group 1:</b> n=15 SLT intervention with rTMS | Word Finding SLT           | Unreported                                                                                                                                                              | Speech and language therapist   | Face-to-face; 1-to-1               | <u>Frequency:</u> 5 days a week. <u>Duration:</u> 2 weeks. <u>Intensity:</u> 3.75 hours. <u>Dosage:</u> 7.5 hours.                              | By functional relevance and difficulty | Unreported |



*SUPPLEMENTAL MATERIAL - Dosage, intensity and frequency of therapy for aphasia*

|                            |                                    |                                                         |                                                             |                                                 |                               |                      |                                                                                                                       |                                        |            |
|----------------------------|------------------------------------|---------------------------------------------------------|-------------------------------------------------------------|-------------------------------------------------|-------------------------------|----------------------|-----------------------------------------------------------------------------------------------------------------------|----------------------------------------|------------|
| <b>Efstratiadou (2019)</b> | Home and hospital                  | <b>Group 2:</b> n=15<br>SLT intervention with sham rTMS | Word Finding SLT                                            | Unreported                                      | Speech and language therapist | Face-to-face; 1-to-1 | <u>Frequency:</u> 5 days a week. <u>Duration:</u> 2 weeks. <u>Intensity:</u> 3.75 hours. <u>Dosage:</u> 7.5 hours.    | By functional relevance and difficulty | Unreported |
|                            |                                    | <b>Group 1:</b> n=18                                    | Word Finding SLT                                            | Semantic SLT                                    | Speech and language therapist | Face-to-face; 1-to-1 | <u>Frequency:</u> 3 days a week. <u>Duration:</u> 12 weeks. <u>Intensity:</u> 3 hours. <u>Dosage:</u> 36 hours.       | By difficulty                          | No         |
|                            |                                    | <b>Group 2:</b> n=8                                     | Word Finding SLT                                            | Semantic SLT                                    | Speech and language therapist | Face-to-face; 1-to-1 | <u>Frequency:</u> 3 days a week. <u>Duration:</u> 12 weeks. <u>Intensity:</u> 3 hours. <u>Dosage:</u> 36 hours.       | By difficulty                          | No         |
|                            |                                    | <b>Group 3:</b> n=12                                    | No SLT but then as per Group 1 (n=4) or Group 2 (n=6) above |                                                 |                               |                      |                                                                                                                       |                                        |            |
| <b>You (2011)</b>          | Hospital rehabilitation department | <b>Group 1:</b> n=7                                     | Mixed SLT                                                   | Functional or Pragmatic SLT and Co-intervention | Speech and language therapist | Face-to-face; 1-to-1 | <u>Frequency:</u> 5 days a week. <u>Duration:</u> 2 weeks. <u>Intensity:</u> 2.5 hours. <u>Dosage:</u> up to 5 hours. | Unreported                             | Unreported |
|                            |                                    | <b>Group 2:</b> n=7                                     | Mixed SLT                                                   | Functional or Pragmatic SLT and Co-intervention | Speech and language therapist | Face-to-face; 1-to-1 | <u>Frequency:</u> 5 days a week. <u>Duration:</u> 2 weeks. <u>Intensity:</u> 2.5 hours. <u>Dosage:</u> up to 5 hours. | Unreported                             | Unreported |
|                            |                                    | <b>Group 3:</b> n=7                                     | Mixed SLT                                                   | Functional or Pragmatic SLT and Co-intervention | Speech and language therapist | Face-to-face; 1-to-1 | <u>Frequency:</u> 5 days a week. <u>Duration:</u> 2 weeks. <u>Intensity:</u> 2.5 hours. <u>Dosage:</u> up to 5 hours. | Unreported                             | Unreported |

**Table III. Characteristics of included SLT interventions**

|                                                  |  |                    |
|--------------------------------------------------|--|--------------------|
| <b>Speech and Language Therapy</b>               |  |                    |
| Defined intervention                             |  | 593 IPD, 24 trials |
| Conventional Therapy (no detail)                 |  | 104 IPD, 3 trials  |
| Therapy with Co-interventions                    |  | 83 IPD, 5 trials   |
| <b>SLT Theoretical Approach</b>                  |  |                    |
| Functional or Pragmatic                          |  | 98 IPD, 3 trials   |
| Phonological                                     |  | 45 IPD, 2 trials   |
| Semantic                                         |  | 27 IPD, 1 trial    |
| Semantic and Phonological                        |  | 108 IPD, 4 trials  |
| Constraint Induced Aphasia Therapy               |  | 44 IPD, 3 trials   |
| Melodic Intonation Therapy                       |  | 24 IPD, 1 trial    |
| <b>SLT Impairment Target</b>                     |  |                    |
| Mixed Auditory Comprehension and Spoken Language |  | 249 IPD, 8 trials  |
| Auditory                                         |  | 17 IPD, 2 trials   |
| Spoken Language only                             |  | 70 IPD, 2 trials   |
| Word finding                                     |  | 224 IPD, 11 trials |
| <b>Delivery</b>                                  |  |                    |
| Face to face                                     |  | 628 IPD, 21 trials |
| Computer-based                                   |  | 164 IPD, 6 trials  |
| Self-managed                                     |  | 66 IPD, 1 trial    |
| Phone                                            |  | 9 IPD, 1 trial     |
| <b>Therapy setting</b>                           |  |                    |
| Healthcare facility                              |  | 554 IPD, 18 trials |
| Home                                             |  | 441 IPD, 15 trials |
| <b>Provider</b>                                  |  |                    |
| Professional (e.g. therapist)                    |  | 730 IPD, 25 trials |
| Non-professional (Family member, volunteer)      |  | 31 IPD, 3 trials   |
| <b>Personalisation</b>                           |  |                    |
| Tailoring by functional relevance reported (Y)   |  | 346 IPD, 11 trials |
| Tailoring by level of difficulty reported (Y)    |  | 520 IPD, 18 trials |
| <b>Regimen data</b>                              |  |                    |
| Frequency                                        |  | 877 IPD, 25 trials |
| Duration                                         |  | 825 IPD, 24 trials |
| Intensity                                        |  | 884 IPD, 25 trials |
| Dosage                                           |  | 875 IPD, 25 trials |
| <b>Home practice tasks</b> reported (Y/N)        |  | 312 IPD, 8 trials  |

IPD Individual participant data; Y yes;

**Table IV. Cluster-effect analysis; p values for within-study clustering effect**

|                          | <b>Frequency</b> | <b>Intensity</b> | <b>Dosage</b> | <b>Duration</b> |
|--------------------------|------------------|------------------|---------------|-----------------|
| Overall language ability | 0.31             | 0*               | 0*            | 0*              |
| Functional communication | 0.24             | 0*               | 0.15          | 0*              |
| Auditory comprehension   | 0.076            | 0.097            | 0*            | 0.10            |
| Naming                   | 0.11             | 0.120            | 0.30          | 0*              |

\*G matrix was not positive definite

**Table V. SLT rehabilitation by impairment target and language outcome**

| Language outcome                                 | RCTs<br>n | IPD<br>n | Estimate of means<br>(95% CI) |
|--------------------------------------------------|-----------|----------|-------------------------------|
| <b>Overall language ability – WAB-AQ [0-100]</b> |           |          |                               |
| Mixed                                            | 8         | 245      | 15.62 (8.82 to 22.43)         |
| Spoken Language                                  | 2         | 70       | 12.83 (-0.99 to 26.64)        |
| Auditory comprehension                           | 1         | 6        | 11.91 (-7.05 to 30.87)        |
| Word Finding                                     | 0         | 0        | -                             |
| Reference Group                                  | 2         | 65       | 12.23 (3.75 to 20.70)         |
| <b>Auditory Comprehension - AAT-TT [0-50]</b>    |           |          |                               |
| Mixed                                            | 5         | 142      | 3.37 (-1.20 to 7.93)          |
| Spoken Language                                  | 0         | 0        | -                             |
| Auditory comprehension                           | 2         | 17       | 1.25 (-7.58 to 10.09)         |
| Word Finding                                     | 7         | 136      | 4.46 (0.31 to 8.62)           |
| Reference Group                                  | 4         | 29       | 2.54 (-2.40 to 7.47)          |
| <b>Naming - BNT [0-60]</b>                       |           |          |                               |
| Mixed                                            | 4         | 84       | 7.33 (0.58 to 14.08)          |
| Auditory comprehension                           | 2         | 25       | 0.33 (-11.29 to 11.95)        |
| Word Finding                                     | 7         | 174      | 8.82 (3.15 to 14.49)          |
| Reference Group                                  | 3         | 27       | 10.24 (3.56 to 16.92)         |
| <b>Functional Communication - AAT-SSC [0-5]</b>  |           |          |                               |
| Mixed                                            | 3         | 72       | 1.05 (0.52 to 1.58)           |
| Spoken Language                                  | 1         | 52       | 0.68 (-0.40 to 1.77)          |
| Auditory comprehension                           | 8         | 184      | 0.72 (0.33 to 1.10)           |
| Word Finding                                     | 0         | 0        | -                             |
| Reference Group                                  | 4         | 58       | 0.75 (0.26 to 1.23)           |

IPD Individual Participant Data

**Table VI. SLT theoretical approach by language outcome**

| Language outcome                                 | RCTs<br>(n) | IPD<br>(n) | Estimate of means<br>(95% CI) |
|--------------------------------------------------|-------------|------------|-------------------------------|
| <b>Overall language ability – WAB-AQ [0-100]</b> |             |            |                               |
| Semantic/phonological                            | 2           | 60         | 20.39 (1.90 to 38.88)         |
| Phonological                                     | 0           | 0          | -                             |
| CIAT                                             | 1           | 10         | 16.11 (-4.87to 37.09)         |
| Functional/pragmatic                             | 2           | 83         | 13.50 (-1.48 to 28.47)        |
| Reference group                                  | 2           | 65         | 23.46 (4.98 to 41.95)         |
| <b>Auditory Comprehension - AAT-TT [0-50]</b>    |             |            |                               |
| Semantic/phonological                            | 1           | 35         | 11.93 (1.44 to 22.43)         |
| Semantic                                         | 1           | 27         | 3.29 (-4.90 to 11.48)         |
| Phonological                                     | 2           | 45         | 5.95 (-1.56 to 13.46)         |
| CIAT                                             | 2           | 32         | 7.46 (0.67 to 14.25)          |
| MIT                                              | 1           | 23         | 0.26 (-10.08 to 10.59)        |
| Functional/pragmatic                             | 3           | 98         | 5.52 (-0.86 to 11.91)         |
| Reference group                                  | 4           | 29         | 2.33 (-3.53 to 8.20)          |
| <b>Naming - BNT [0-60]</b>                       |             |            |                               |
| Semantic/phonological                            | 1           | 35         | 19.38 (-13.50 to 52.27)       |
| Semantic                                         | 1           | 26         | -2.48 (-35.82 to 30.87)       |
| Phonological                                     | 1           | 25         | -1.66 (-34.92 to 31.60)       |
| CIAT                                             | 1           | 13         | 15.53 (-4.48 to 35.55)        |
| MIT                                              | 1           | 20         | -2.25 (-35.04 to 30.53)       |
| Functional/pragmatic                             | 2           | 32         | 4.91 (-18.39 to 28.22)        |
| Reference group                                  | 3           | 27         | 14.78 (-4.60 to 34.15)        |
| <b>Functional Communication - AAT-SSC [0-5]</b>  |             |            |                               |
| Semantic/phonological                            | 3           | 100        | 0.71 (-0.15 to 1.55)          |
| Semantic                                         | 1           | 26         | 0.35 (-1.15 to 1.86)          |
| Phonological                                     | 1           | 25         | 0.37 (-1.11 to 1.84)          |
| CIAT                                             | 1           | 13         | 0.77 (-0.22 to 1.75)          |
| MIT                                              | 1           | 24         | 0.20 (-1.11 to 1.50)          |
| Functional/pragmatic                             | 1           | 8          | 1.82 (0.36 to 3.28)           |
| Reference group                                  | 4           | 58         | 0.68 (-0.10 to 1.46)          |

IPD Individual Participant Data

**Table VII. SLT Home-Practice by language domain**

| Language outcome                                 | RCTs (n) | IPD (n) | Estimate of means<br>(95% CI) |
|--------------------------------------------------|----------|---------|-------------------------------|
| <b>Overall language ability – WAB-AQ [0-100]</b> |          |         |                               |
| Yes                                              | 2        | 87      | 16.69 (10.01 to 23.37)        |
| No                                               | 10       | 330     | 13.35 (8.21 to 18.48)         |
| <b>Auditory Comprehension - AAT-TT [0-50]</b>    |          |         |                               |
| Yes                                              | 7        | 278     | 5.28 (2.19 to 8.37)           |
| No                                               | 10       | 217     | 2.27 (-0.67 to 5.22)          |
| <b>Naming - BNT [0-60]</b>                       |          |         |                               |
| Yes                                              | 4        | 167     | 6.94 (-0.57 to 14.46)         |
| No                                               | 9        | 166     | 7.08 (1.81 to 12.35)          |
| <b>Functional Communication - AAT-SSC [0-5]</b>  |          |         |                               |
| Yes                                              | 5        | 187     | 0.61 (0.18 to 1.04)           |
| No                                               | 10       | 267     | 0.74 (0.39 to 1.09)           |

IPD Individual Participant Data

**Table VIII. Tailoring of SLT interventions (functional relevance and level of difficulty) by language domain**

| Tailoring                                                            | Target       | RCTs | IPD | Estimate of means (CI 95%) |
|----------------------------------------------------------------------|--------------|------|-----|----------------------------|
| <b>Overall Language</b>                                              |              |      |     |                            |
| Functional                                                           | Tailored     | 6    | 232 | 16.47 (10.95 to 21.99)     |
|                                                                      | Not tailored | 7    | 185 | 12.05 (6.90 to 17.20)      |
| Difficulty                                                           | Tailored     | 7    | 210 | 14.46 (8.82 to 20.09)      |
|                                                                      | Not tailored | 6    | 207 | 13.24 (7.50 to 18.99)      |
| <b>Auditory Comprehension (AAT-TT range 0-50)</b>                    |              |      |     |                            |
| Functional                                                           | Tailored     | 7    | 194 | 5.26 (2.05 to 8.47)        |
|                                                                      | Not tailored | 10   | 301 | 2.43 (-0.57 to 5.43)       |
| Difficulty                                                           | Tailored     | 10   | 331 | 4.57 (1.55 to 7.60)        |
|                                                                      | Not tailored | 7    | 164 | 1.95 (-1.30 to 5.20)       |
| <b>Naming (BNT range 0 to 60)</b>                                    |              |      |     |                            |
| Functional                                                           | Tailored     | 5    | 113 | 8.79 (1.95 to 15.63)       |
|                                                                      | Not tailored | 8    | 220 | 5.95 (0.57 to 11.32)       |
| Difficulty                                                           | Tailored     | 9    | 254 | 5.66 (0.74 to 10.58)       |
|                                                                      | Not tailored | 4    | 79  | 10.21 (2.75 to 17.67)      |
| <b>Functional Communication (observer rated AAT SC range 0 to 5)</b> |              |      |     |                            |
| Functional                                                           | Tailored     | 6    | 249 | 0.74 (0.38 to 1.10)        |
|                                                                      | Not tailored | 8    | 195 | 0.71 (0.32 to 1.11)        |
| Difficulty                                                           | Tailored     | 10   | 313 | 0.65 (0.32 to 0.98)        |
|                                                                      | Not tailored | 5    | 141 | 0.81 (0.34 to 1.27)        |

Difficulty: Interventions tailored by level of language difficulty;

Functional: Interventions tailored by functional relevance to the participant.

**Table IX. Trial group comparisons at baseline by age, sex, aphasia severity, time since stroke onset.**

| Study ID | Group | N  | Age Median [IQR] | Wilcoxon p | Male Sex N (%) | Chi-Sq p | Aphasia severity WAB AQ median [IQR] | Wilcoxon p   | Time since stroke (days) Median [IQR] | Wilcoxon p |
|----------|-------|----|------------------|------------|----------------|----------|--------------------------------------|--------------|---------------------------------------|------------|
| 1.       | A     | 64 | 75.5 [66, 84]    | 0.23       | 33 (53.2)      | 0.08     | 57.1 [28.2, 64.4]                    | 0.78         | 3 [2, 4]                              | 0.19       |
|          | B     | 61 | 79 [72, 85]      |            | 23 (37.7)      |          | 58.0 [28.2, 64.7]                    |              | 3 [2, 4]                              |            |
| 2.       | A     | 5  | 55 [47, 66]      | 0.37       | 4 (80)         | 0.49     | -                                    | -            | 1887 [1745, 2092]                     | 0.84       |
|          | B     | 5  | 48 [45, 53]      |            | 3 (60)         |          | -                                    |              | 2259 [1871, 2478]                     |            |
| 3.       | A     | 17 | 71 [65, 80]      | 0.30       | 9 (52.9)       | 0.29     | -                                    | -            | 2031.5 [1096, 3127]                   | 0.53       |
|          | B     | 17 | 66 [53, 76]      |            | 12 (70.6)      |          | -                                    |              | 2042 [1761, 3512]                     |            |
| 4.       | A     | 15 | 70 [64, 74]      | 0.54       | 5 (83.3)       | 0.63     | -                                    | -            | 426 [365, 609]                        | 0.36       |
|          | B     | 17 | 67 [56, 73]      |            | 11 (73.3)      |          | -                                    |              | 183 [91, 914]                         |            |
| 5.       | A     | 6  | 45 [28, 57]      | 0.29       | 5 (83.3)       | 0.43     | 75.9 [71.4, 81.2]                    | 0.67         | 106.5 [30, 244]                       | 0.88       |
|          | B     | 7  | 55 [52, 63]      |            | 6 (85.7)       |          | 73.8 [55.9, 80.3]                    |              | 61 [30, 61]                           |            |
|          | C     | 5  | 52 [47, 54]      |            | 3 (60)         |          | 72.1 [58.1, 90.1]                    |              | 152 [61, 152]                         |            |
|          | D     | 6  | 56 [48, 58]      |            | 3 (50)         |          | 65.7 [59.2, 72.1]                    |              | 91 [61, 152]                          |            |
| 6.       | A     | 6  | 55.5 [49, 63]    | 1.0        | 5 (83.3)       | 0.51     | 39.4 [35.4, 47.8]                    | 0.44         | 61 [30, 122]                          | 0.48       |
|          | B     | 6  | 53.5 [49, 62]    |            | 4 (66.7)       |          | 48.7 [42.7, 56.3]                    |              | 121.5 [30, 335]                       |            |
| 7.       | A     | 72 | 55 [46.5, 60]    | 0.70       | 49 (68.1)      | 0.24     | 70.4 [40.7, 87.9]                    | 0.80         | 822.5 [396, 1462]                     | 0.056      |
|          | B     | 70 | 54 [50, 61]      |            | 41 (58.6)      |          | 67.2 [44.1, 84.8]                    |              | 1263.5 [487, 2071]                    |            |
| 8.       | A     | 6  | 69.5 [63, 75]    | 0.53       | 4 (66.7)       | 0.56     | -                                    | -            | 2.5 [2, 3]                            | 1.00       |
|          | B     | 6  | 61.5 [59, 72]    |            | 3 (50)         |          | -                                    |              | 2 [2, 3]                              |            |
| 9.       | A     | 32 | 72.5 [62.5, 79]  | 0.52       | 14 (43.8)      | 0.37     | 31 [9.75, 54.5]                      | <b>0.045</b> | 2.5 [2, 4]                            | 0.59       |
|          | B     | 27 | 67 [58, 79]      |            | 15 (55.6)      |          | 9 [0, 34.1]                          |              | 3 [2, 4]                              |            |
| 10.      | A     | 17 | 65 [57, 71]      | 0.23       | 10 (58.8)      | 0.10     | 74.9 [42, 87.3]                      | 0.54         | 105 [56, 126]                         | 0.28       |
|          | B     | 14 | 69.5 [59, 74]    |            | 12 (85.7)      |          | 55.3 [34.2, 87.7]                    |              | 175 [70, 364]                         |            |
| 11.      | A     | 14 | 55.5 [50, 67]    | 0.11       | 9 (64.3)       | 0.48     | -                                    | -            | 1141.5 [426, 2223]                    | 0.75       |
|          | B     | 10 | 51.5 [41, 54]    |            | 5 (50)         |          | -                                    |              | 913.5 [335, 2101]                     |            |
| 12.      | A     | 9  | 72 [64, 77]      | 0.23       | 4 (44.4)       | 0.50     | 56.3 [0, 81.2]                       | 0.46         | 7 [7, 7]                              | 1.00       |
|          | B     | 8  | 63 [58.5, 69]    |            | 4 (50)         |          | 60.6 [56.3, 81.2]                    |              | 7 [7, 7]                              |            |
|          | C     | 9  | 64 [61, 72]      |            | 7 (77.8)       |          | 64.9 [56.3, 64.9]                    |              | 7 [7, 7]                              |            |
|          | D     | 10 | 66.5 [59, 75]    |            | 6 (60)         |          | 56.3 [0, 64.9]                       |              | 7 [7, 7]                              |            |
| 13.      | A     | 15 | 57 [51, 72]      | 0.12       | 10 (66.7)      | 0.70     | 29 [11.5, 67.9]                      | 0.62         | 56 [42, 70]                           | 0.74       |
|          | B     | 15 | 64 [58, 71]      |            | 9 (60)         |          | 43.1 [16.3, 64.7]                    |              | 42 [28, 70]                           |            |



*SUPPLEMENTAL MATERIAL - Dosage, intensity and frequency of therapy for aphasia*

|     |   |    |                   |       |           |       |                   |      |                      |       |
|-----|---|----|-------------------|-------|-----------|-------|-------------------|------|----------------------|-------|
| 14. | A | 10 | 65.5 [56, 69]     | 0.02  | 9 (90)    | 0.26  | -                 | -    | 1324.5 [1066, 1797]  | 0.059 |
|     | B | 10 | 47.5 [43, 61]     |       | 7 (70)    |       | -                 |      | 913.5 [548, 1035]    |       |
| 15. | A | 8  | 64.3 [56.4, 70]   | 0.57  | 4 (50)    | 1.00  | -                 | -    | 360.5 [345, 383.5]   | 0.19  |
|     | B | 10 | 67.4 [56.3, 74.3] |       | 5 (50)    |       | -                 |      | 373.5 [367, 447]     |       |
| 16. | A | 10 | 56.5 [51, 61]     | 0.34  | 5 (50)    | 0.68  | 28.2 [0, 56.3]    | 0.72 | 28 [14, 35]          | 0.37  |
|     | B | 19 | 61 [54, 68]       |       | 8 (42.1)  |       | 0 [0, 56.3]       |      | 28 [14, 56]          |       |
| 17. | A | 7  | 68 [56, 77]       | 0.32  | 5; (71.4) | 0.48  | -                 | -    | 639 [365, 700]       | 0.85  |
|     | B | 4  | 61.5 [37, 67.5]   |       | 2 (50)    |       | -                 |      | 1020 [441.5, 1446.5] |       |
| 18. | A | 38 | 68 [62, 78]       | 0.95  | 14 (36.8) | 0.07  | -                 | -    | 22.5 [17, 26]        | 0.95  |
|     | B | 42 | 69.5 [57, 79]     |       | 24 (57.1) |       | -                 |      | 22 [19, 24]          |       |
| 19. | A | 28 | 64.9 [58.7, 73.9] | 0.075 | 18 (64.3) | 0.34  | -                 | -    | 116.5 [102.5, 145]   | 1.00  |
|     | B | 29 | 58.3 [50.1, 69.1] |       | 15 (51.7) |       | -                 |      | 115 [101, 147]       |       |
| 20. | A | 18 | 54 [49, 61]       | 0.98  | 11 (61.1) | 0.22  | -                 | -    | 106.5 [61, 1127]     | 0.71  |
|     | B | 26 | 55.5 [48, 61]     |       | 11 (42.3) |       | -                 |      | 61 [61, 548]         |       |
| 21. | A | 15 | 67 [65, 73]       | 0.71  | 9 (60)    | 0.14  | -                 | -    | 47 [28, 69]          | 0.37  |
|     | B | 15 | 70 [59, 47]       |       | 5 (33.3)  |       | -                 |      | 38 [24, 56]          |       |
| 22. | A | 11 | 63 [61.4; 67.8]   | 0.55  | 11 (100)  | 0.038 | -                 | -    | 1242 [438, 2703]     | 0.55  |
|     | B | 9  | 62.4 [50.2, 66.5] |       | 6 (66.7)  |       | -                 |      | 657 [438, 1863]      |       |
| 23. | A | 8  | 57.5 [53.5, 66.5] | 0.97  | 7 (87.5)  | 0.19  | -                 | -    | 853 [365.5, 3014.5]  | 0.12  |
|     | B | 12 | 54.5 [49.5, 69]   |       | 6 (50)    |       | -                 |      | 213.5 [122, 594]     |       |
|     | C | 18 | 61 [48, 67]       |       | 13 (72.2) |       | -                 |      | 198 [152, 1248]      |       |
| 24. | A | 12 | 74.5 [53, 83.5]   | 0.76  | 9 (75)    | 0.09  | 45.5 [14.6, 70.4] | 0.62 | 5 [4, 8]             | 0.38  |
|     | B | 8  | 76.5 [65.5, 82.5] |       | 3 (37.5)  |       | 51.1 [17.7, 68.1] |      | 6.5 [4.5, 8.5]       |       |
| 25. | A | 7  | 66 [62, 80]       | 0.40  | 3 (42.9)  | 0.56  | 48 [9.9, 58.4]    | 0.50 | 23 [20, 30]          | 0.71  |
|     | B | 7  | 65 [49, 78]       |       | 4; 57.1)  |       | 57.8 [19, 58.1]   |      | 23 [20, 35]          |       |
|     | C | 7  | 64 [55, 72]       |       | 5 (71.4)  |       | 38.1 [20.7, 48.8] |      | 22 [18, 35]          |       |

Abbreviations ID identification number; N number of participants; IQR interquartile range; Chi-Sq Chi square; \* Kruskal-Wallis test

**Table X. Year of publication and report of significant findings**

| Year of publication | Significant result reported |          |
|---------------------|-----------------------------|----------|
|                     | No                          | Yes      |
| 1973-1989           | 7                           | 4 (37%)  |
| 1990-1999           | 2                           | 13 (87%) |
| 2000-2004           | 3                           | 16 (84%) |
| 2005-2009           | 4                           | 28 (88%) |
| 2010-2014           | 15                          | 53 (78%) |
| 2015-2017           | 3                           | 12 (80%) |

We considered risk of publication bias but due to the nature of the dataset a funnel plot was unsuitable. Instead, we considered the historic nature of the data and examined whether there was an association between the age of publication and the reporting of significant findings. Our analysis was restricted to datasets with an associated publication. Using a chi-squared test we found evidence to suggest a publication bias by date of publication ( $p=0.014$ ). Earlier publications had a higher proportion of non-significant results than findings reported in more recent publications.

**Table XI. Risk of bias and age of dataset**

| Overall language ability | Estimate (95% CI)     | IPD | Datasets |
|--------------------------|-----------------------|-----|----------|
| 2000 and later           | 15.25 (8.92 to 21.58) | 111 | 4        |
| Before 2000              | 10.36 (2.75 to 17.97) | 371 | 7        |
| Functional communication |                       |     |          |
| 2000 and later           | 0.69 (0.39 to 1.00)   | 103 | 2        |
| Before 2000              | 0.54 (-0.15 to 1.23)  | 430 | 12       |
| Auditory comprehension   |                       |     |          |
| 2000 and later           | 3.90 (0.73 to 7.06)   | 82  | 3        |
| Before 2000              | 1.84 (-4.45 to 8.14)  | 458 | 13       |
| Naming                   |                       |     |          |
| 2000 and later           | 7.82 (2.80 to 12.83)  | 81  | 3        |
| Before 2000              | 3.51 (-5.67 to 12.69) | 304 | 10       |

We considered the risk of bias and the age of included datasets. We took recruitment date as reported by the primary research team and where unavailable we took the date of the first associated publication. Recruitment was grouped as pre-2000 and post-2000. These recruitment groups were added to the basic model of baseline aphasia severity score, sex, time since stroke and age. We found no evidence that recruitment date contributed to the findings.

**Table XII. Wu-Hausman test for fixed versus random effects model**

| Language domain          | W    | Alt-W | Fixed effect p | Relative variability |
|--------------------------|------|-------|----------------|----------------------|
| Overall language ability | 0.13 | 0.36  | <0.0001        | 19.3%                |
| Functional communication | 3.49 | -1.97 | <0.0001        | 30.8%                |
| Auditory comprehension   | 3.55 | -1.89 | <0.0001        | 24.3%                |
| Naming                   | 0.37 | -0.61 | <0.0001        | 41.4%                |

Abbreviations W: Wu-Hausman test; Alt-Wu: Alternative Wu-Hausman Test.

**Table XIII. Functional communication (observer-rated) data including TOMs participation data**

| Effect                          | RCT data only |                   |         |            |
|---------------------------------|---------------|-------------------|---------|------------|
|                                 | Number<br>DF  | Denominator<br>DF | F Value | P<br>value |
| <b>Frequency of SLT</b>         |               |                   |         |            |
| Baseline score                  | 1             | 499               | 34.78   | <.0001     |
| Sex                             | 1             | 499               | 4.18    | 0.042      |
| Age group                       | 3             | 499               | 0.97    | 0.41       |
| Time since stroke group         | 3             | 499               | 4.72    | 0.0029     |
| Randomisation                   | -             | -                 | -       | -          |
| Frequency group                 | 5             | 499               | 1.05    | 0.39       |
| <b>Duration of SLT</b>          |               |                   |         |            |
| Baseline score                  | 1             | 448               | 41.68   | <.0001     |
| Sex                             | 1             | 448               | 4.28    | 0.039      |
| Age group                       | 3             | 448               | 0.91    | 0.43       |
| Time since stroke group         | 3             | 448               | 5.03    | 0.0019     |
| Randomisation                   | -             | -                 | -       | -          |
| Duration group                  | 5             | 448               | 1.15    | 0.33       |
| <b>Intensity of SLT</b>         |               |                   |         |            |
| Baseline score                  | 1             | 506               | 39.91   | <.0001     |
| Sex                             | 1             | 506               | 3.72    | 0.055      |
| Age group                       | 3             | 506               | 1.42    | 0.24       |
| Time since stroke group         | 3             | 506               | 4.50    | 0.0039     |
| Randomisation                   | -             | -                 | -       | -          |
| Intensity group                 | 5             | 506               | 1.16    | 0.33       |
| <b>Dosage of SLT</b>            |               |                   |         |            |
| Baseline score                  | 1             | 497               | 40.35   | <.0001     |
| Sex                             | 1             | 497               | 5.70    | 0.017      |
| Age group                       | 3             | 497               | 0.96    | 0.41       |
| Time since stroke group         | 3             | 497               | 4.11    | 0.0067     |
| Randomisation                   | -             | -                 | -       | -          |
| Dosage group                    | 5             | 497               | 2.74    | 0.019      |
| <b>Home practice of SLT</b>     |               |                   |         |            |
| Baseline score                  | 1             | 431               | 38.38   | <.0001     |
| Sex                             | 1             | 431               | 2.83    | 0.093      |
| Age group                       | 3             | 431               | 1.92    | 0.13       |
| Time since stroke group         | 3             | 431               | 4.24    | 0.0057     |
| Randomisation                   | -             | -                 | -       | -          |
| Home practice                   | 1             | 431               | 0.40    | 0.53       |
| <b>SLT Target</b>               |               |                   |         |            |
| Baseline score                  | 1             | 345               | 28.00   | <.0001     |
| Sex                             | 1             | 345               | 4.90    | 0.028      |
| Age group                       | 3             | 345               | 1.68    | 0.17       |
| Time since stroke group         | 3             | 345               | 2.34    | 0.07       |
| Randomisation                   | -             | -                 | -       | -          |
| SLT Target                      | 3             | 345               | 0.73    | 0.53       |
| <b>SLT Theoretical Approach</b> |               |                   |         |            |
| Baseline score                  | 1             | 234               | 17.09   | <.0001     |
| Sex                             | 1             | 234               | 3.93    | 0.049      |
| Age group                       | 3             | 234               | 2.19    | 0.09       |

*SUPPLEMENTAL MATERIAL - Dosage, intensity and frequency of therapy for aphasia*

|                                   |   |     |       |        |
|-----------------------------------|---|-----|-------|--------|
| Time since stroke group           | 3 | 234 | 2.16  | 0.09   |
| Randomisation                     | - | -   | -     | -      |
| Theoretical Approach              | 6 | 234 | 0.75  | 0.61   |
| <b>Expertise-non-professional</b> |   |     |       |        |
| Baseline score                    | 1 | 509 | 39.51 | <.0001 |
| Sex                               | 1 | 509 | 3.71  | 0.055  |
| Age group                         | 3 | 509 | 1.42  | 0.24   |
| Time since stroke group           | 3 | 509 | 3.88  | 0.0092 |
| Randomisation                     | - | -   | -     | -      |
| Expertise-professional            | 1 | 509 | 2.96  | 0.086  |
| Expertise-non-professional        | 1 | 509 | 1.56  | 0.21   |
| <b>Context of therapy</b>         |   |     |       |        |
| Baseline score                    | 1 | 509 | 38.36 | <.0001 |
| Sex                               | 1 | 509 | 3.67  | 0.056  |
| Age group                         | 3 | 509 | 1.27  | 0.28   |
| Time since stroke group           | 3 | 509 | 5.84  | 0.0006 |
| Randomisation                     | - | -   | -     | -      |
| Inpatient                         | 1 | 509 | 1.43  | 0.23   |
| Outpatient                        | 1 | 509 | 2.08  | 0.15   |
| <b>Mode of therapy</b>            |   |     |       |        |
| Baseline score                    | 1 | 508 | 39.41 | <.0001 |
| Sex                               | 1 | 508 | 3.75  | 0.05   |
| Age group                         | 3 | 508 | 1.52  | 0.21   |
| Time since stroke group           | 3 | 508 | 2.59  | 0.05   |
| Randomisation                     | - | -   | -     | -      |
| Mode face to face                 | 1 | 508 | 3.48  | 0.063  |
| Mode computer                     | 1 | 508 | 0.57  | 0.45   |
| <b>Functional relevance</b>       |   |     |       |        |
| Baseline score                    | 1 | 422 | 39.28 | <.0001 |
| Sex                               | 1 | 422 | 3.02  | 0.083  |
| Age group                         | 3 | 422 | 2.05  | 0.11   |
| Time since stroke group           | 3 | 422 | 3.25  | 0.022  |
| Randomisation                     | - | -   | -     | -      |
| Functional relevance              | 1 | 422 | 0.00  | 1.00   |
| <b>Level of difficulty</b>        |   |     |       |        |
| Baseline score                    | 1 | 431 | 38.43 | <.0001 |
| Sex                               | 1 | 431 | 2.87  | 0.091  |
| Age group                         | 3 | 431 | 1.89  | 0.13   |
| Time since stroke group           | 3 | 431 | 4.20  | 0.006  |
| Randomisation                     | - | -   | -     | -      |
| Level of difficulty               | 1 | 431 | 0.35  | 0.55   |

**Table XIV. Duplicate data, choice of data items and justification**

Duplication of language data items by domains and dataset were identified. The language data taken forward to inform our analysis is highlighted together with justification for the choice of dataset.

***(i) Overall language ability; Anchor Measure WAB -AQ***

| <b>Study ID</b> | <b>Measures<br/>(IPD baseline, follow-up)</b> | <b>Choice made with reason</b>                                   |
|-----------------|-----------------------------------------------|------------------------------------------------------------------|
| 023             | WAB (0, 98)<br>WAB-AQ (59, 98)                | WAB-AQ – IPD at baseline and follow-up available                 |
| 027             | ASRS (30, 32)<br>WAB-AQ (30, 57)              | WAB-AQ – more IPD at follow-up WAB-AQ is also the anchor measure |

***(ii) Auditory comprehension; Anchor Measure AAT-TT Test***

| <b>Study ID</b> | <b>Measures<br/>(IPD baseline, follow-up)</b>   | <b>Choice made with reason</b>                                            |
|-----------------|-------------------------------------------------|---------------------------------------------------------------------------|
| 011a            | PICA (24, 24)<br>TT62 (24, 24)                  | TT62 is within the same family as the anchor measure                      |
| 011c            | PPVT (12, 24)<br>PICA (12, 12)<br>TT62 (12, 12) | PPVT has more IPD at follow-up                                            |
| 015             | AAT (140, 0)<br>SAPS (136, 136)<br>TT (141, 0)  | SAPS has IPD at follow-up                                                 |
| 026             | PSCT (25, 108)<br>TT36 (31, 216)                | TT62 has more IPD at baseline and follow-up                               |
| 027             | LAAB (30, 57)<br>TT (29, 56)                    | LAAB has more IPD at baseline and follow-up                               |
| 054             | PALPA (80, 0)<br>TT36 (76, 155)                 | TT36 is only one with IPD at follow-up                                    |
| 060             | PALPA (57, 51)<br>TT (57, 52)                   | TT has marginally more IPD at follow-up and it is also the anchor measure |
| 067             | AAT (44, 39)<br>TT (40, 0)                      | AAT is the only one with IPD at follow-up                                 |

***(iii) Naming; Anchor Measure BNT***

| <b>Study ID</b> | <b>Measures<br/>(IPD baseline, follow-up)</b> | <b>Choice made and reason</b>       |
|-----------------|-----------------------------------------------|-------------------------------------|
| 011a            | ONT (24, 48)<br>PICA (24, 24)                 | ONT has more IPD at follow-up       |
| 011c            | ONT (12, 24)<br>PICA (12, 12)                 | ONT has more IPD at follow-up       |
| 041             | BNT (11, 22)<br>CAT (11, 22)                  | BNT is the anchor measure           |
| 054             | AAT (72, 0)<br>BNT (71, 152)                  | BNT has IPD at follow-up            |
| 081             | BNT-G (38, 64)<br>Snodgrass (38, 76)          | Snodgrass has more IPD at follow-up |

**(iv) Functional communication (observer-rated) Anchor Measure AAT**

| <b>Study ID</b> | <b>Measures<br/>(IPD baseline, follow-up)</b>                      | <b>Choice made and reason</b>                                 |
|-----------------|--------------------------------------------------------------------|---------------------------------------------------------------|
| 006             | AAT (10, 0)<br>CAL (10, 20)                                        | CAL has IPD at follow-up                                      |
| 008             | TOMs-activity (34, 49)<br>TOMs-participation (34, 49)              | Analysis done on set with activity and set with participation |
| 015             | AAT (142, 0)<br>ANELT (72, 142)<br>CETI (71, 129)<br>KOPS (40, 36) | ANELT has more IPD at baseline and follow-up                  |
| 054             | AAT (72, 0)<br>ANELT (80, 160)                                     | ANELT has IPD at follow-up                                    |

**Table XV SLT frequency and goodness of fit to baseline, sex, age and time; model by language domain**

| <b>Effect</b>                   | <b>Number<br/>DF</b> | <b>Denominator<br/>DF</b> | <b>F Value</b> | <b>P value</b> |
|---------------------------------|----------------------|---------------------------|----------------|----------------|
| <b>Overall language ability</b> |                      |                           |                |                |
| Baseline score                  | 1                    | 458                       | 79.03          | <.0001         |
| Sex                             | 1                    | 458                       | 1.86           | 0.17           |
| Age group                       | 3                    | 458                       | 1.18           | 0.32           |
| Time since stroke group         | 3                    | 458                       | 2.00           | 0.11           |
| Randomisation                   | -                    | -                         | -              | -              |
| Frequency group                 | 5                    | 458                       | 0.93           | 0.46           |
| <b>Auditory Comprehension</b>   |                      |                           |                |                |
| Baseline score                  | 1                    | 511                       | 83.31          | <.0001         |
| Sex                             | 1                    | 511                       | 0.86           | 0.35           |
| Age group                       | 3                    | 511                       | 5.40           | 0.0012         |
| Time since stroke group         | 3                    | 511                       | 1.30           | 0.28           |
| Randomisation                   | -                    | -                         | -              | -              |
| Frequency group                 | 5                    | 511                       | 3.10           | 0.0091         |
| <b>Naming</b>                   |                      |                           |                |                |
| Baseline score                  | 1                    | 360                       | 4.99           | 0.026          |
| Sex                             | 1                    | 360                       | 0.06           | 0.81           |
| Age group                       | 3                    | 360                       | 2.64           | 0.049          |
| Time since stroke group         | 3                    | 360                       | 2.13           | 0.097          |
| Randomisation                   | -                    | -                         | -              | -              |
| Frequency group                 | 4                    | 360                       | 2.70           | 0.030          |
| <b>Functional Communication</b> |                      |                           |                |                |
| Baseline score                  | 1                    | 499                       | 34.09          | <.0001         |
| Sex                             | 1                    | 499                       | 5.54           | 0.019          |
| Age group                       | 3                    | 499                       | 0.86           | 0.46           |
| Time since stroke group         | 3                    | 499                       | 4.08           | 0.0071         |
| Randomisation                   | -                    | -                         | -              | -              |
| Frequency group                 | 5                    | 499                       | 1.45           | 0.21           |

DF = degrees of freedom; F value = F statistic

**Table XVI. SLT duration and goodness of fit to baseline, sex, age and time; model by language domain**

| <b>Effect</b>                   | <b>Numerator<br/>DF</b> | <b>Denominator<br/>DF</b> | <b>F Value</b> | <b>P value</b> |
|---------------------------------|-------------------------|---------------------------|----------------|----------------|
| <b>Overall language ability</b> |                         |                           |                |                |
| Baseline score                  | 1                       | 408                       | 99.39          | <.0001         |
| Sex                             | 1                       | 408                       | 2.08           | 0.15           |
| Age group                       | 3                       | 408                       | 1.38           | 0.25           |
| Time since stroke group         | 3                       | 408                       | 3.54           | 0.01           |
| Randomisation                   | -                       | -                         | -              | -              |
| Duration group                  | 1                       | 408                       | 0.96           | 0.44           |
| <b>Auditory Comprehension</b>   |                         |                           |                |                |
| Baseline score                  | 1                       | 511                       | 82.38          | <.0001         |
| Sex                             | 1                       | 511                       | 0.58           | 0.45           |
| Age group                       | 3                       | 511                       | 5.75           | 0.0007         |
| Time since stroke group         | 3                       | 511                       | 1.46           | 0.22           |
| Randomisation                   | -                       | -                         | -              | -              |
| Duration group                  | 5                       | 511                       | 4.04           | 0.0013         |
| <b>Naming</b>                   |                         |                           |                |                |
| Baseline score                  | 1                       | 360                       | 5.38           | 0.021          |
| Sex                             | 1                       | 360                       | 0.03           | 0.86           |
| Age group                       | 3                       | 360                       | 2.63           | 0.05           |
| Time since stroke group         | 3                       | 360                       | 1.95           | 0.12           |
| Randomisation                   | -                       | -                         | -              | -              |
| Duration group                  | 4                       | 360                       | 0.10           | 0.98           |
| <b>Functional communication</b> |                         |                           |                |                |
| Baseline score                  | 1                       | 448                       | 40.69          | <.0001         |
| Sex                             | 1                       | 448                       | 5.60           | 0.018          |
| Age group                       | 3                       | 448                       | 0.67           | 0.57           |
| Time since stroke group         | 3                       | 448                       | 4.35           | 0.0049         |
| Randomisation                   | -                       | -                         | -              | -              |
| Duration group                  | 5                       | 448                       | 1.28           | 0.27           |

DF = degrees of freedom; F value = F statistic



**Table XVII: SLT intensity and goodness of fit to baseline, sex, age, time since index stroke; model by language domain**

| <b>Effect</b>                   | <b>Numerator<br/>DF</b> | <b>Denominator<br/>DF</b> | <b>F Value</b> | <b>P value</b> |
|---------------------------------|-------------------------|---------------------------|----------------|----------------|
| <b>Overall language ability</b> |                         |                           |                |                |
| Baseline score                  | 1                       | 458                       | 78.41          | <.0001         |
| Sex                             | 1                       | 458                       | 1.75           | 0.19           |
| Age group                       | 3                       | 458                       | 1.41           | 0.24           |
| Time since stroke group         | 3                       | 458                       | 2.27           | 0.08           |
| Randomisation                   | -                       | -                         | -              | -              |
| Intensity group                 | 5                       | 458                       | 0.95           | 0.45           |
| <b>Auditory Comprehension</b>   |                         |                           |                |                |
| Baseline score                  | 1                       | 511                       | 86.69          | <.0001         |
| Sex                             | 1                       | 511                       | 0.56           | 0.46           |
| Age group                       | 3                       | 511                       | 6.16           | 0.0004         |
| Time since stroke group         | 3                       | 511                       | 1.77           | 0.15           |
| Randomisation                   | -                       | -                         | -              | -              |
| Intensity group                 | 5                       | 511                       | 4.67           | 0.0004         |
| <b>Naming</b>                   |                         |                           |                |                |
| Baseline score                  | 1                       | 359                       | 4.94           | 0.03           |
| Sex                             | 1                       | 359                       | 0.09           | 0.76           |
| Age group                       | 3                       | 359                       | 2.49           | 0.06           |
| Time since stroke group         | 3                       | 359                       | 1.61           | 0.17           |
| Randomisation                   | -                       | -                         | -              | -              |
| Intensity group                 | 5                       | 359                       | 1.90           | 0.09           |
| <b>Functional Communication</b> |                         |                           |                |                |
| Baseline score                  | 1                       | 506                       | 35.98          | <.0001         |
| Sex                             | 1                       | 506                       | 5.48           | 0.02           |
| Age group                       | 3                       | 506                       | 1.22           | 0.30           |
| Time since stroke group         | 3                       | 506                       | 3.86           | 0.0095         |
| Randomisation                   | -                       | -                         | -              | -              |
| Intensity group                 | 5                       | 506                       | 1.13           | 0.34           |

DF = degrees of freedom; F value = F statistic.

**Table XVIII: SLT dosage and goodness of fit to baseline, sex, age and time; model by language domain**

| <b>Effect</b>                   | <b>Numerator<br/>DF</b> | <b>Denominator<br/>DF</b> | <b>F Value</b> | <b>P value</b> |
|---------------------------------|-------------------------|---------------------------|----------------|----------------|
| <b>Overall language ability</b> |                         |                           |                |                |
| Baseline score                  | 1                       | 456                       | 80.20          | <.0001         |
| Sex                             | 1                       | 456                       | 2.39           | 0.12           |
| Age group                       | 3                       | 456                       | 1.32           | 0.27           |
| Time since stroke group         | 3                       | 456                       | 2.62           | 0.05           |
| Randomisation                   | -                       | -                         | -              | -              |
| Dosage group                    | 5                       | 456                       | 1.70           | 0.13           |
| <b>Auditory Comprehension</b>   |                         |                           |                |                |
| Baseline score                  | 1                       | 511                       | 87.74          | <.0001         |
| Sex                             | 1                       | 511                       | 0.72           | 0.40           |
| Age group                       | 3                       | 511                       | 5.52           | 0.001          |
| Time since stroke group         | 3                       | 511                       | 1.47           | 0.22           |
| Randomisation                   | -                       | -                         | -              | -              |
| Dosage group                    | 5                       | 511                       | 1.38           | 0.23           |
| <b>Naming</b>                   |                         |                           |                |                |
| Baseline score                  | 1                       | 360                       | 6.31           | 0.01           |
| Sex                             | 1                       | 360                       | 0.07           | 0.79           |
| Age group                       | 3                       | 360                       | 2.51           | 0.06           |
| Time since stroke group         | 3                       | 360                       | 1.31           | 0.27           |
| Randomisation                   | -                       | -                         | -              | -              |
| Dosage group                    | 5                       | 360                       | 2.36           | 0.04           |
| <b>Functional Communication</b> |                         |                           |                |                |
| Baseline score                  | 1                       | 497                       | 38.15          | <.0001         |
| Sex                             | 1                       | 497                       | 6.56           | 0.01           |
| Age group                       | 3                       | 497                       | 0.92           | 0.43           |
| Time since stroke group         | 3                       | 497                       | 4.34           | 0.005          |
| Randomisation                   | -                       | -                         | -              | -              |
| Dosage group                    | 5                       | 497                       | 2.76           | 0.018          |

DF = degrees of freedom; F value = F statistic.

**Table XIX. Trials including people with aphasia after stroke, but which did not inform our IPD network meta-analysis:** (i) IPD included in RELEASE database but minimum data items for our analysis reported here were unavailable; (ii) Potentially eligible trials invited to contribute IPD, but IPD remained unavailable. Availability of minimum data items was unconfirmed

| Citation                                                                                                                                                                                                                                                                                                                                                                                                                 | Location | Potential IPD | SLT                                                                                    |
|--------------------------------------------------------------------------------------------------------------------------------------------------------------------------------------------------------------------------------------------------------------------------------------------------------------------------------------------------------------------------------------------------------------------------|----------|---------------|----------------------------------------------------------------------------------------|
| <i>Table XIX (i). Included trials in RELEASE database with IPD, but minimum data points or data items remained unavailable</i>                                                                                                                                                                                                                                                                                           |          |               |                                                                                        |
| Bowen A, Hesketh A, Patchick E, Young A, Davies L, Vail A, <i>et al.</i> Clinical effectiveness, cost effectiveness and service users' perceptions of early, well-resourced communication therapy following a stroke: a randomised controlled trial (the ACT NoW Study). <i>Health Technology Assessment</i> 2012; <b>16</b> (26):1-160. <a href="https://doi.org/10.3310/hta16260">https://doi.org/10.3310/hta16260</a> | UK       | 153           | Eligible language data was unavailable                                                 |
| Baker JM, Rorden C, Fridriksson J. Using transcranial direct-current stimulation to treat stroke patients with aphasia. <i>Stroke</i> 2010; <b>41</b> (6):1229-1236. <a href="https://doi.org/10.1161/STROKEAHA.109.576785">https://doi.org/10.1161/STROKEAHA.109.576785</a>                                                                                                                                             | USA      | 10            | IPD outcomes following intervention unavailable                                        |
| Barwood CH, Murdoch BE, Whelan BM, Lloyd D, Riek S, O'Sullivan K, <i>et al.</i> The effects of low frequency Repetitive Transcranial Magnetic Stimulation (rTMS) and sham condition rTMS on behavioural language in chronic non-fluent aphasia: short term outcomes. <i>NeuroRehabilitation</i> 2011; <b>28</b> (2):113-128. <a href="https://doi.org/10.3233/NRE20110640">https://doi.org/10.3233/NRE20110640</a>       | AU       | 12            | No SLT intervention during study                                                       |
| Berthier ML, Green C, Lara JP, Higuera C, Barbancho MA, Dávila G, <i>et al.</i> Memantine and constraint-induced aphasia therapy in chronic poststroke aphasia. <i>Annals of Neurology</i> 2009; <b>65</b> (5):577-585. <a href="https://doi.org/10.1002/ana.21597">https://doi.org/10.1002/ana.21597</a>                                                                                                                | ES       | 28            | Eligible language data was unavailable                                                 |
| Thomas SA, Walker MF, Macniven JA, Haworth H, Lincoln NB. Communication and Low Mood (CALM): a randomized controlled trial of behavioural therapy for stroke patients with aphasia. <i>Clinical Rehabilitation</i> 2013; <b>27</b> (5):398-408. <a href="https://doi.org/10.1177/0269215512462227">https://doi.org/10.1177/0269215512462227</a>                                                                          | UK       | 105           | No SLT intervention within study                                                       |
| Rosso C, Perlberg V, Valabregue R, Arbizu C, Ferrieux S, Alshawan B <i>et al.</i> Broca's area damage is necessary but not sufficient to induce after-effects of cathodal tDCS on the unaffected hemisphere in post-stroke aphasia. <i>Brain Stimulation</i> 2014; <b>7</b> (5):627-635.                                                                                                                                 | FR       | 35            | No SLT intervention within study                                                       |
| David RM. <i>A comparison of speech therapists and volunteers in the treatment of acquired aphasia.</i> PhD thesis. London: University of London; 1982.                                                                                                                                                                                                                                                                  | UK       | 155           | Social support comparison intervention                                                 |
| Elman RJ, Bernstein-Ellis E. The efficacy of group communication treatment in adults with chronic aphasia. <i>Journal of Speech, Language and Hearing Research</i> 1999; <b>42</b> (2):411-419. <a href="https://doi.org/10.1044/jslhr.4202.411">https://doi.org/10.1044/jslhr.4202.411</a>                                                                                                                              | US       | 24            | SLT intervention delivered but post-intervention IPD language outcome data unavailable |

SUPPLEMENTAL MATERIAL - Dosage, intensity and frequency of therapy for aphasia

|                                                                                                                                                                                                                                                                                                                                                                     |     |     |                                                                                        |
|---------------------------------------------------------------------------------------------------------------------------------------------------------------------------------------------------------------------------------------------------------------------------------------------------------------------------------------------------------------------|-----|-----|----------------------------------------------------------------------------------------|
| Hinckley JJ, Patterson JP, Carr TH. Differential effects of context- and skill-based treatment approaches: preliminary findings. <i>Aphasiology</i> 2001; <b>15</b> (5):463-476. <a href="https://doi.org/10.1080/02687040042000340">https://doi.org/10.1080/02687040042000340</a>                                                                                  | USA | 17  | SLT intervention delivered but post-intervention IPD language outcome data unavailable |
| Kang EK, Kim YK, Sohn HM, Cohen LG, Paik N-J. Improved picture naming in aphasia patients treated with cathodal tDCS to inhibit the right Broca's homologue area. <i>Restorative Neurology and Neuroscience</i> 2011; <b>29</b> (3):141-152. <a href="https://doi.org/10.3233/RNN-2011-0587">https://doi.org/10.3233/RNN-2011-0587</a>                              | KR  | 10  | SLT intervention delivered but post-intervention IPD language outcome data unavailable |
| Kendall DL, Oelke M, Brookshire CE, Nadeau SE. The influence of phonomotor treatment on word retrieval abilities in 26 individuals with chronic aphasia: an open trial. <i>Journal of Speech Language and Hearing Research</i> 2015; <b>58</b> (3):798-812. <a href="https://doi.org/10.1044/2015_JSLHR-L-14-0131">https://doi.org/10.1044/2015_JSLHR-L-14-0131</a> | US  | 26  | RCT but reported as cohort. Group allocation code unavailable                          |
| Laska AC, von Arbin M, Kahan T, Hellblom A, Murray V. Long-term antidepressant treatment with moclobemide for aphasia in acute stroke patients: a randomised, double-blind, placebo-controlled study. <i>Cerebrovascular Diseases</i> 2005; <b>19</b> (2):125-132.                                                                                                  | SE  | 119 | No SLT intervention within study                                                       |
| Lyon JG, Cariski D, Keisler L, Rosenbek J, Levine R, Kumpula J, <i>et al.</i> Communication partners: enhancing participation in life and communication for adults with aphasia in natural settings. <i>Aphasiology</i> 1997; <b>11</b> (7):693-708. <a href="https://doi.org/10.1080/02687039708249416">https://doi.org/10.1080/02687039708249416</a>              | US  | 10  | Eligible language data was unavailable                                                 |
| Marangolo P, Fiori V, Calpagnano MA, Campana S, Razzana C, Caltagirone C, <i>et al.</i> tDCS over the left inferior frontal cortex improves speech production in aphasia. <i>Frontiers in Human Neuroscience</i> 2013; <b>7</b> :539. <a href="https://doi.org/10.3389/fnhum.2013.00539">https://doi.org/10.3389/fnhum.2013.00539</a>                               | IT  | 12  | SLT intervention delivered but post-intervention IPD language outcome data unavailable |
| Marshall RC, King PS. Effects of fatigue produced by isokinetic exercise on the communication ability of aphasic adults. <i>Journal of Speech Language and Hearing Research</i> 1973; <b>16</b> (2):222-230.                                                                                                                                                        | US  | 16  | No SLT intervention within study<br>Eligible language data was unavailable             |
| Medina J, Norise C, Faseyitan O, Coslett HB, Turkeltaub PE, Hamilton RH. Finding the right words: transcranial magnetic stimulation improves discourse productivity in non-fluent aphasia after stroke. <i>Aphasiology</i> 2012; <b>26</b> (9):1153-1168. <a href="https://doi.org/10.1080/02687038.2012.710316">https://doi.org/10.1080/02687038.2012.710316</a>   | USA | 10  | No SLT intervention within study                                                       |
| Polanowska KE, Leśniak MM, Seniów JB, Czepiel W, Członkowska A. Anodal transcranial direct current stimulation in early rehabilitation of patients with post-stroke non-fluent aphasia: a                                                                                                                                                                           | PL  | 26  | Post-intervention IPD language outcome data unavailable                                |

SUPPLEMENTAL MATERIAL - Dosage, intensity and frequency of therapy for aphasia

|                                                                                                                                                                                                                                                                                                                                                                                                  |      |                                  |                                                         |
|--------------------------------------------------------------------------------------------------------------------------------------------------------------------------------------------------------------------------------------------------------------------------------------------------------------------------------------------------------------------------------------------------|------|----------------------------------|---------------------------------------------------------|
| randomized, double-blind, sham-controlled pilot study. <i>Restorative Neurology and Neuroscience</i> 2013; <b>31</b> (6):761-771. <a href="https://doi.org/10.3233/RNN-130333">https://doi.org/10.3233/RNN-130333</a>                                                                                                                                                                            |      |                                  |                                                         |
| Pulvermüller F, Neininger B, Elbert T, Mohr B, Rockstroh B, Koebbel P, et al. Constraint-induced therapy of chronic aphasia after stroke. <i>Stroke</i> 2001; <b>32</b> (7):1621-1626. <a href="https://doi.org/10.1161/01.STR.32.7.1621">https://doi.org/10.1161/01.STR.32.7.1621</a>                                                                                                           | DE   | 17                               | Post-intervention IPD language outcome data unavailable |
| Roberts PM, Le Dorze G. Bilingual aphasia: semantic organization, strategy use, and productivity in semantic verbal fluency. <i>Brain and Language</i> 1998; <b>65</b> (2):287-312. <a href="https://doi.org/10.1006/brln.1998.1992">https://doi.org/10.1006/brln.1998.1992</a>                                                                                                                  | CA   | 16                               | No SLT intervention within study                        |
| Seniów J, Waldowski K, Leśniak M, Iwański S, Czepiel W, Członkowska A. Transcranial magnetic stimulation combined with speech and language training in early aphasia rehabilitation: a randomized double-blind controlled pilot study. <i>Topics in Stroke Rehabilitation</i> 2013; <b>20</b> (3):250-261. <a href="https://doi.org/10.1310/tsr2003-250">https://doi.org/10.1310/tsr2003-250</a> | PL   | 40                               | Post-intervention IPD language outcome data unavailable |
| Shah-Basak PP, Norise C, Garcia G, Torres J, Faseyitan O, Hamilton RH. Individualized treatment with transcranial direct current stimulation in patients with chronic non-fluent aphasia due to stroke. <i>Frontiers in Human Neuroscience</i> 2015; <b>9</b> (201). <a href="https://doi.org/10.3389/fnhum.2015.00201">https://doi.org/10.3389/fnhum.2015.00201</a>                             | US   | 12                               | Post-intervention IPD language outcome data unavailable |
| Springer L, Willmes K, Haag E. Training in the use of wh-questions and prepositions in dialogues: a comparison of two different approaches in aphasia therapy. <i>Aphasiology</i> 1993; <b>7</b> (3):251-270. <a href="https://doi.org/10.1080/02687039308249509">https://doi.org/10.1080/02687039308249509</a>                                                                                  | DE   | 12                               | Post-intervention IPD language outcome data unavailable |
| <b>Table XIX (ii) Potentially eligible trials invited to contribute IPD, but IPD remained unavailable. Availability of minimum data items was unconfirmed</b>                                                                                                                                                                                                                                    |      |                                  |                                                         |
| Ashtary F, Janghorbani M, Chitsaz A, Reisi M, Bahrami A. A randomized double-blind trial of bromocriptine efficacy in nonfluent aphasia after stroke. <i>Neurology</i> 2006; <b>66</b> :914-6.                                                                                                                                                                                                   | Iran | 38                               | Usual care - regimen unreported                         |
| Bakheit AMO, Shaw S, Barrett L, Wood J, Carrington S, Griffiths S, et al. A prospective, randomized, parallel group, controlled study of the effect of intensity of speech and language therapy on early recovery from poststroke aphasia. <i>Clinical Rehabilitation</i> 2007; <b>21</b> :885-94.                                                                                               | UK   | 97<br>(plus n=19 non-randomised) | 5 hours SLT versus 2 hours SLT                          |

SUPPLEMENTAL MATERIAL - Dosage, intensity and frequency of therapy for aphasia

|                                                                                                                                                                                                                                                                                                                                                 |       |                       |                                                                                                                                          |
|-------------------------------------------------------------------------------------------------------------------------------------------------------------------------------------------------------------------------------------------------------------------------------------------------------------------------------------------------|-------|-----------------------|------------------------------------------------------------------------------------------------------------------------------------------|
| Berthier ML, Green C, Higuera C, Fernandez I, Hinojosa J, Martin MC. A randomized, placebo-controlled study of donepezil in poststroke aphasia. <i>Neurology</i> 2006; <b>67</b> :1687-9.                                                                                                                                                       | Spain | 26                    | Usual care - regimen unreported                                                                                                          |
| Cherney L. Oral Reading for Language in Aphasia (ORLA): Evaluating the efficacy of computer-delivered therapy in chronic nonfluent aphasia. <i>Topics in Stroke Rehabilitation</i> 2010; <b>17</b> :423-31.                                                                                                                                     | USA   | 25                    | SLT with virtual therapist versus therapist for 1 hour of therapy, 2 to 3 time weekly for 24 sessions (24 hours in total)                |
| Cherney LB, Babbitt, Cole R, Vuuren S, Hurwitz R, Ngampatipatpong N. Computer treatment for aphasia: efficacy and treatment intensity. <i>Archives of Physical Medicine and Rehabilitation</i> 2006; <b>87</b> :E5.                                                                                                                             | USA   | 13                    | 4 versus 10 hours SLT weekly for 6 weeks                                                                                                 |
| Conklyn D, Novak E, Boissy A, Bethoux F, Chemali K. The effects of modified melodic intonation therapy on nonfluent aphasia: a pilot study. <i>Journal of Speech, Language and Hearing Research</i> 2012; <b>55</b> :1463-71. <a href="http://dx.doi.org/10.1044/1092-4388(2012/11-0105)">http://dx.doi.org/10.1044/1092-4388(2012/11-0105)</a> | USA   | 30                    | 10 to 15 minutes therapy for up to three sessions. 30-45 minutes total dosage                                                            |
| Crosson B, Fabrizio KS, Singletary F, Cato MA, Wierenga CE, Parkinson RB, et al. Treatment of naming in nonfluent aphasia through manipulation of intention and attention: a phase 1 comparison of two novel treatments. <i>Journal of the International Neuropsychological Society</i> 2007; <b>13</b> :582-94.                                | USA   | 23                    | Naming therapy with gesture versus usual care. 1 hour SLT, twice daily, 5 days per week for a total of 30 session. Total dosage 30 hours |
| Denes G, Perazzolo C, Piani A, Piccione F. Intensive versus regular speech therapy in global aphasia: a controlled study. <i>Aphasiology</i> 1996; <b>10</b> :385-94.                                                                                                                                                                           | Italy | 17                    | 45-60 minutes SLT, 5 times weekly for 6 months                                                                                           |
| Di Carlo LM. Language recovery in aphasia: effect of systematic filmed programmed instruction. <i>Archives of Physical Medicine and Rehabilitation</i> 1980; <b>61</b> :41-4.                                                                                                                                                                   | USA   | 14                    | SLT details unreported but at least 80 hours for 5-22 months                                                                             |
| Elman RJ, Bernstein-Ellis E. Psychosocial aspects of group communication treatment. Preliminary findings. <i>Seminars in Speech and Language</i> 1999; <b>20</b> :65-2.                                                                                                                                                                         | USA   | 12 (plus n=12 no SLT) | Group SLT for 150 minutes, twice weekly for 4 months for a total dosage 160 hours                                                        |

*SUPPLEMENTAL MATERIAL - Dosage, intensity and frequency of therapy for aphasia*

|                                                                                                                                                                                                                                                                                                                                                             |          |    |                                                                                |
|-------------------------------------------------------------------------------------------------------------------------------------------------------------------------------------------------------------------------------------------------------------------------------------------------------------------------------------------------------------|----------|----|--------------------------------------------------------------------------------|
| Enderby P, Broeckx J, Hospers W, Schildermans F, Deberdt W. Effect of piracetam on recovery and rehabilitation after stroke: a double-blind, placebo-controlled study. <i>Clinical Neuropharmacology</i> 1994; <b>17</b> :320-31.                                                                                                                           | UK       | 67 | SLT dosage reported in hours at group summary level                            |
| Ferro JM, Leal G, Farrajota L, Fonseca J, Guerreiro M, Castro-Caldas A. Speech therapy or home training for stroke aphasics? <i>Journal of neurology</i> 1992; <b>239</b> :20.                                                                                                                                                                              | Portugal | 94 | SLT over 6 months. Further details unreported                                  |
| Gonzalez I, Petit H, Muller F, Daviet JC, Trias J, De BX, <i>et al.</i> The workbook of communication C.COM in disclosure alterations of severe vascular aphasia, Le cahier de communication C.COM dans les alterations de la communication de l'aphasie vasculaire severe. <i>Annals of Physical and Rehabilitation Medicine</i> 2012; <b>55</b> :e213-e6. | France   | 29 | SLT regimen unreported                                                         |
| Gungor L, Terzi M, Onar MK. Does long term use of piracetam improve speech disturbances due to ischemic cerebrovascular diseases? <i>Brain and Language</i> 2011; <b>117</b> :23-7.                                                                                                                                                                         | Turkey   | 30 | Usual care - regimen unreported                                                |
| Gupta SR, Mlcoch AG, Scolaro C, Moritz T. Bromocriptine treatment of nonfluent aphasia. <i>Neurology</i> 1995; <b>45</b> :2170-3.                                                                                                                                                                                                                           | USA      | 20 | Usual care - regimen unreported                                                |
| Hamzei-Moghaddam A, Shafa MA, Nazari M, Akbari M. The effect of priacetam in aphasia due to acute brain ischemic stroke: Clinical trial. <i>Journal of Kerman University of Medical Sciences</i> 2014; <b>21</b> :219-29.                                                                                                                                   | Iran     | 40 | Usual care - regimen unreported                                                |
| Howard D, Patterson K, Franklin S, Orchard-Lisle V, Morton J. Treatment of word retrieval deficits in aphasia. A comparison of two therapy methods. <i>Brain</i> 1985; <b>108 (Pt 4)</b> :817-29.                                                                                                                                                           | UK       | 12 | 2 versus 4 weeks of semantic or phonological SLT                               |
| Huber W, Willmes K, Poeck K, Van Vleymen B, Deberdt W. Piracetam as an adjuvant to language therapy for aphasia: a randomized double-blind placebo-controlled pilot study. <i>Archives of Physical Medicine and Rehabilitation</i> 1997; <b>78</b> :245-50.                                                                                                 | Germany  | 66 | SLT for 60 minutes, 10 times week (5 individuals; 5 group therapy) for 6 weeks |

SUPPLEMENTAL MATERIAL - Dosage, intensity and frequency of therapy for aphasia

|                                                                                                                                                                                                                                  |                           |                                                |                                                                                                                                                                                             |
|----------------------------------------------------------------------------------------------------------------------------------------------------------------------------------------------------------------------------------|---------------------------|------------------------------------------------|---------------------------------------------------------------------------------------------------------------------------------------------------------------------------------------------|
| Katz RC, Wertz RT. The efficacy of computer-provided reading treatment of chronic aphasic adults. <i>Journal of Speech, Language &amp; Hearing Research</i> 1997; <b>40</b> :493-507.                                            | USA                       | 21 (of 63)                                     | SLT 3 hours weekly for 26 weeks; 78 hours dosage                                                                                                                                            |
| Kessler J, Thiel A, Karbe H, Heiss WD. Piracetam improves activated blood flow and facilitates rehabilitation of poststroke aphasic patients. <i>Stroke</i> ; 2000; <b>31</b> :2112-6.                                           | Germany                   | 24                                             | SLT for 60 minutes, 5 times weekly for 6 weeks. 30 hours total dosage.                                                                                                                      |
| Lincoln NB, McGuirk E, Mulley GP. Effectiveness of speech therapy for aphasic stroke patients. A randomised controlled trial. <i>Lancet</i> 1984; <b>1</b> :1197-200.                                                            | UK                        | 76 (of 327 randomised)                         | Usual care SLT for 1 hour, twice weekly, for 24 weeks. 48 hours total dosage                                                                                                                |
| Liu Y, Zhang L. The TCM-combined treatment for aphasia due to cerebrovascular disorders. <i>Journal of traditional Chinese medicine / Chung i tsa chih ying wen pan</i> 2006; <b>26</b> :19-21.                                  | Peoples Republic of China | 19 (of 36 randomised)                          | SLT details unreported                                                                                                                                                                      |
| Ma L. Cognitive function training for patients with thalamic aphasia. <i>Chinese Journal of Clinical Rehabilitation</i> 2005; <b>9</b> :160-1.                                                                                   | China                     | 30                                             | SLT details unreported                                                                                                                                                                      |
| MacKay S, Holmes DW, Gersumky AT. Methods to assess aphasic stroke patients. <i>Geriatric Nursing (New York, NY)</i> 1988; <b>9</b> :177-9.                                                                                      | USA                       | 95 but SLT versus no SLT allocation unreported | SLT for 3 to 6 hours weekly, for 1 year. Up to 312 hours dosage.                                                                                                                            |
| Marshall RC, Wertz RT, Weiss DG, Aten JL, Brookshire RH, Garcia-Bunuel L, <i>et al.</i> Home treatment for aphasic patients by trained nonprofessionals. <i>Journal of Speech and Hearing Disorders</i> 1989; <b>54</b> :462-70. | USA                       | 81 (of 121 randomised)                         | Usual care SLT (n=38); 8-10 hours weekly, for 12 weeks. Up to 120 hours dosage<br>versus<br>Volunteer-facilitated SLT (n=43) for 8 to 10 hours weekly, for 12 weeks. 120 hours total dosage |
| Nobis-Bosch R, Springer L, Radermacher I, Huber W. Supervised Home Training in Aphasia: Language Learning in Dialogues. <i>Forum Logopadie</i> 2010; <b>24</b> :6-13.                                                            | Germany                   | 9 (of 18 randomised)                           | SLT (n=9) for 1 hour, twice daily, four days each week for 4 week plus 1 hour individual SLT session versus (no SLT) n=9                                                                    |



SUPPLEMENTAL MATERIAL - Dosage, intensity and frequency of therapy for aphasia

|                                                                                                                                                                                                                                                                                                            |             |                       |                                                                                                                                                                               |
|------------------------------------------------------------------------------------------------------------------------------------------------------------------------------------------------------------------------------------------------------------------------------------------------------------|-------------|-----------------------|-------------------------------------------------------------------------------------------------------------------------------------------------------------------------------|
| Polanowska KE, Lesniak M, Seniow JB, Czlonkowska A. No effects of anodal transcranial direct stimulation on language abilities in early rehabilitation of post-stroke aphasic patients. <i>Neurologia i neurochirurgia polska</i> 2013; <b>47</b> :414-22.                                                 | Poland      | 37                    | SLT 45 minutes daily, five times weekly, for three weeks. 11 hours total dosage.                                                                                              |
| Prins RS, Schoonen R, Vermeulen J. Efficacy of Two Different Types of Speech Therapy for Aphasic Stroke Patients. <i>Applied Psycholinguistics</i> 1989; <b>10</b> :85-123.                                                                                                                                | Netherlands | 21                    | SLT twice weekly for 5 months. Dosage unreported                                                                                                                              |
| Seniow J, Litwin M, Litwin T, Lesniak M, Czlonkowska A. New approach to the rehabilitation of post-stroke focal cognitive syndrome: effect of levodopa combined with speech and language therapy on functional recovery from aphasia. <i>Journal of the neurological sciences</i> 2009; <b>283</b> :214-8. | Poland      | 39                    | SLT 45 minutes, 5 times weekly, for 3 weeks. 11 hours total dosage.                                                                                                           |
| Shewan CM, Kertesz A. Effects of speech and language treatment on recovery from aphasia. <i>Brain and Language</i> 1984; <b>23</b> :272-99.                                                                                                                                                                | Canada      | 52 (of 77 randomised) | Language oriented SLT (n=28) 1 hour, 3 times weekly for 12 months. 156 hours total dosage. Usual care SLT (n=24) 1 hour, 3 times weekly for 12 months. 156 hours              |
| Sickert A, Anders LC, Münte T, Sailer M. Constraint-induced aphasia therapy following sub-acute stroke: a single-blind, randomised clinical trial of a modified therapy schedule. <i>Journal of Neurology, Neurosurgery &amp; Psychiatry</i> 2014; <b>85</b> :51-5.                                        | Germany     | 100                   | Constraint-induced aphasia therapy (n=50) 2 hours SLT daily, for 15 days. Total dosage 30 hours. Usual care SLT (n=50) 2 hours SLT daily, for 15 days. Total dosage 30 hours. |
| Spielmann K, Van De Sandt-Koenderman MWME, Ribbers GM. Transcranial direct current stimulation (tDCS) to enhance treatment effects in aphasia. <i>Archives of Physical Medicine and Rehabilitation</i> 2014; <b>95</b> :e21.                                                                               | Netherlands | 58                    | SLT for 2 weeks.                                                                                                                                                              |
| Tsai PY, Wang CP, Ko JS, Chung YM, Chang YW, Wang JX. The persistent and broadly modulating effect of inhibitory rTMS in nonfluent                                                                                                                                                                         | Taiwan      | 56                    | SLT for 1 hour in addition to usual care                                                                                                                                      |

SUPPLEMENTAL MATERIAL - Dosage, intensity and frequency of therapy for aphasia

|                                                                                                                                                                                                                                                                                                                 |                            |                         |                                                                                       |
|-----------------------------------------------------------------------------------------------------------------------------------------------------------------------------------------------------------------------------------------------------------------------------------------------------------------|----------------------------|-------------------------|---------------------------------------------------------------------------------------|
| <p>aphasic patients: a sham-controlled, double-blind study. <i>Neurorehabilitation and Neural Repair</i> 2014;28:779-87. <a href="http://dx.doi.org/10.1177/1545968314522710">http://dx.doi.org/10.1177/1545968314522710</a></p>                                                                                |                            |                         |                                                                                       |
| <p>Waldowski K, Seniow J, Lesniak M, Iwanski S, Czlonkowska A. Effect of low-frequency repetitive transcranial magnetic stimulation on naming abilities in early-stroke aphasic patients: a prospective, randomized, double-blind sham-controlled study. <i>Scientific World Journal</i> 2012;2012:518568-.</p> | Poland                     | 26                      | SLT for 45 minutes, 5 days a week for 3 weeks. Total dosage 11 hours.                 |
| <p>Walker-Batson D, Unwin H, Ford J, Curtis S, Porch B. A double-blind controlled study of the use of amphetamine in the treatment of aphasia. <i>Stroke</i> 2001;32:2093-2098.</p>                                                                                                                             | USA                        | 21                      | SLT for 1 hour, for 10 sessions over 5 weeks                                          |
| <p>Wang L, Liu SM, Liu M, Li BJ, Hui ZL, Gao X. [Post-stroke speech disorder treated with acupuncture and psychological intervention combined with rehabilitation training: a randomized controlled trial]. <i>Zhongguo Zhen Jiu</i> 2011;31:481-6.</p>                                                         | People's Republic of China | 120                     | SLT details unreported                                                                |
| <p>Weiduschat N, Thiel A, Rubi-Fessen I, Hartmann A, Kessler J, Merl P, <i>et al.</i> Effects of Repetitive Transcranial Magnetic Stimulation in Aphasic Stroke. A Randomized Controlled Pilot Study. <i>Stroke</i> 2011;42:409-15.</p>                                                                         | Germany                    | 10                      | SLT for 45 minutes                                                                    |
| <p>Wu XJ. Analysis of the effect of "two-step method" on aphasia in patients with acute cerebrovascular disease. <i>Chinese Journal of Clinical Rehabilitation</i> 2004;8:4422-3.</p>                                                                                                                           | People's Republic of China | 120 (of 236 randomised) | SLT details unreported over 6 months SLT duration                                     |
| <p>Xie SL, Zhu MG, Zhang XL, Xue ZJ. The role of community nursing in family rehabilitation of stroke patients with impaired spoken language. <i>Chinese Journal of Clinical Rehabilitation</i> 2002;6:3289.</p>                                                                                                | People's Republic of China | 17 (of 34 randomised)   | SLT for 1 hour, 6 times weekly, over 12 months. 312 hours total dosage                |
| <p>Yao J, Xue Y, Li F. Clinical application research on collective language strengthened training in rehabilitation nursing of cerebral apoplexy patients with aphasia. <i>Chinese Nursing Research</i> 2005;19:482-4.</p>                                                                                      | People's Republic of China | 54                      | SLT (n=30) daily for 28 days. Usual care SLT (n=24) daily. Further details unreported |
| <p>Zhang HM. [Clinical treatment of apoplectic aphemia with multi-needle puncture of scalp-points in combination with visual-listening-speech training]. <i>Zhen ci yan jiu [Acupuncture research]</i> 2007;32:190-4.</p>                                                                                       | People's Republic of China | 19 (of 36 randomised)   | SLT details unreported                                                                |

*SUPPLEMENTAL MATERIAL - Dosage, intensity and frequency of therapy for aphasia*

---

|                                                                                                                                                                                                                                          |                            |                        |                                                             |
|------------------------------------------------------------------------------------------------------------------------------------------------------------------------------------------------------------------------------------------|----------------------------|------------------------|-------------------------------------------------------------|
| Zhang SH, Lu XM. Nursing care of the patient with cerebral infarction and aphasia receiving carotid internal drug injection and early speech training. <i>Journal of Nursing Science</i> 1997; <b>12</b> :34-5.                          | People's Republic of China | 16 (of 35 randomised)  | SLT for 30 minutes, 3 to 5 times daily. Duration unreported |
| Zhao H, Ying B, Shen C. Clinical Study on the Effect of Combined Therapy of Medicine, Acupuncture and Speech Training on Aphasia from Ischemic Apoplexy. <i>Henan Traditional Chinese Medicine Henan Zhong yi</i> 2000; <b>20</b> :31-2. | People's Republic of China | 98 (of 138 randomised) | SLT details unreported                                      |

---

IPD Individual participant data

**Table XX. Unavailable potentially eligible randomised controlled trial IPD**

| Ref | Study References*                                                                                                                                                                                                                                                                                                                               | IPD |
|-----|-------------------------------------------------------------------------------------------------------------------------------------------------------------------------------------------------------------------------------------------------------------------------------------------------------------------------------------------------|-----|
| 1.  | Ashtary F, Janghorbani M, Chitsaz A, Reisi M, Bahrami A. A randomized double-blind trial of bromocriptine efficacy in nonfluent aphasia after stroke. <i>Neurology</i> 2006; <b>66</b> :914-6.                                                                                                                                                  | 38  |
| 2.  | Bakheit AM, Carrington S, Griffiths S, Searle K. High scores on the Western Aphasia Battery correlate with good functional communication skills (as measured with the Communicative Effectiveness Index) in aphasic stroke patients. <i>Disability and Rehabilitation</i> 2005; <b>27</b> :287-91.                                              | 67  |
| 3.  | Bakheit AMO, Shaw S, Barrett L, Wood J, Carrington S, Griffiths S, <i>et al.</i> A prospective, randomized, parallel group, controlled study of the effect of intensity of speech and language therapy on early recovery from poststroke aphasia. <i>Clinical Rehabilitation</i> 2007; <b>21</b> :885-94.                                       | 116 |
| 4.  | Berthier ML, Green C, Higuera C, Fernandez I, Hinojosa J, Martin MC. A randomized, placebo-controlled study of donepezil in poststroke aphasia. <i>Neurology</i> 2006; <b>67</b> :1687-9.                                                                                                                                                       | 28  |
| 5.  | Cherney L. Oral Reading for Language in Aphasia (ORLA): Evaluating the efficacy of computer-delivered therapy in chronic nonfluent aphasia. <i>Topics in Stroke Rehabilitation</i> 2010; <b>17</b> :423-31.                                                                                                                                     | 25  |
| 6.  | Cherney LB, Babbitt, Cole R, Vuuren S, Hurwitz R, Ngampatipatpong N. Computer treatment for aphasia: efficacy and treatment intensity. <i>Archives of Physical Medicine and Rehabilitation</i> 2006; <b>87</b> :E5.                                                                                                                             | 13  |
| 7.  | Conklyn D, Novak E, Boissy A, Bethoux F, Chemali K. The effects of modified melodic intonation therapy on nonfluent aphasia: a pilot study. <i>Journal of Speech, Language and Hearing Research</i> 2012; <b>55</b> :1463-71. <a href="http://dx.doi.org/10.1044/1092-4388(2012/11-0105)">http://dx.doi.org/10.1044/1092-4388(2012/11-0105)</a> | 30  |
| 8.  | Crosson B, Fabrizio KS, Singletary F, Cato MA, Wierenga CE, Parkinson RB, <i>et al.</i> Treatment of naming in nonfluent aphasia through manipulation of intention and attention: a phase 1 comparison of two novel treatments. <i>Journal of the International Neuropsychological Society</i> 2007; <b>13</b> :582-94.                         | 23  |
| 9.  | Denes G, Perazzolo C, Piani A, Piccione F. Intensive versus regular speech therapy in global aphasia: a controlled study. <i>Aphasiology</i> 1996; <b>10</b> :385-94.                                                                                                                                                                           | 17  |
| 10. | Di Carlo LM. Language recovery in aphasia: effect of systematic filmed programmed instruction. <i>Archives of Physical Medicine and Rehabilitation</i> 1980; <b>61</b> :41-4.                                                                                                                                                                   | 14  |
| 11. | Elman RJ, Bernstein-Ellis E. Psychosocial aspects of group communication treatment. Preliminary findings. <i>Seminars in Speech and Language</i> 1999; <b>20</b> :65-2.                                                                                                                                                                         | 12  |
| 12. | Enderby P, Broeckx J, Hospers W, Schildermans F, Deberdt W. Effect of piracetam on recovery and rehabilitation after stroke: a double-blind, placebo-controlled study. <i>Clinical Neuropharmacology</i> 1994; <b>17</b> :320-31.                                                                                                               | 67  |

13. Ferro JM, Leal G, Farrajota L, Fonseca J, Guerreiro M, Castro-Caldas A. Speech therapy or home training for stroke aphasics? *Journal of neurology* 1992;**239**:20. 94
14. Gonzalez I, Petit H, Muller F, Daviet JC, Trias J, De BX, *et al.* The workbook of communication C.COM in disclosure alterations of severe vascular aphasia, Le cahier de communication C.COM dans les alterations de la communication de l'aphasie vasculaire severe. *Annals of Physical and Rehabilitation Medicine* 2012;**55**:e213-e6. 29
15. Gungor L, Terzi M, Onar MK. Does long term use of piracetam improve speech disturbances due to ischemic cerebrovascular diseases? *Brain and Language* 2011;**117**:23-7. 30
16. Gupta SR, Mlcoch AG, Scolaro C, Moritz T. Bromocriptine treatment of nonfluent aphasia. *Neurology* 1995;**45**:2170-3. 20
17. Hamzei-Moghaddam A, Shafa MA, Nazari M, Akbari M. The effect of priacetam in aphasia due to acute brain ischemic stroke: Clinical trial. *Journal of Kerman University of Medical Sciences* 2014;**21**:219-29. 40
18. Howard D, Patterson K, Franklin S, Orchard-Lisle V, Morton J. Treatment of word retrieval deficits in aphasia. A comparison of two therapy methods. *Brain* 1985;**108 (Pt 4)**:817-29. 12
19. Huber W, Willmes K, Poeck K, Van Vleymen B, Deberdt W. Piracetam as an adjuvant to language therapy for aphasia: a randomized double-blind placebo-controlled pilot study. *Archives of Physical Medicine and Rehabilitation* 1997;**78**:245-50. 66
20. Katz RC, Wertz RT. The efficacy of computer-provided reading treatment of chronic aphasic adults. *Journal of Speech, Language & Hearing Research* 1997;**40**:493-507. 55
21. Kessler J, Thiel A, Karbe H, Heiss WD. Piracetam improves activated blood flow and facilitates rehabilitation of poststroke aphasic patients. *Stroke*; 2000;**31**:2112-6. 24
22. Lincoln NB, McGuirk E, Mulley GP. Effectiveness of speech therapy for aphasic stroke patients. A randomised controlled trial. *Lancet* 1984;**1**:1197-200. 191
23. Liu Y, Zhang L. The TCM-combined treatment for aphasia due to cerebrovascular disorders. *Journal of traditional Chinese medicine / Chung i tsa chih ying wen pan* 2006;**26**:19-21. 36
24. Ma L. Cognitive function training for patients with thalamic aphasia. *Chinese Journal of Clinical Rehabilitation* 2005;**9**:160-1. 30
25. MacKay S, Holmes DW, Gersumky AT. Methods to assess aphasic stroke patients. *Geriatric Nursing (New York, NY)* 1988;**9**:177-9. 95
26. Marshall RC, Wertz RT, Weiss DG, Aten JL, Brookshire RH, Garcia-Bunuel L, *et al.* Home treatment for aphasic patients by trained nonprofessionals. *Journal of Speech and Hearing Disorders* 1989;**54**:462-70. 121

27. Nobis-Bosch R, Springer L, Radermacher I, Huber W. Supervised Home Training in Aphasia: Language Learning in Dialogues. *Forum Logopadie* 2010;**24**:6-13. 18
28. Polanowska KE, Lesniak M, Seniow JB, Czlonkowska A. No effects of anodal transcranial direct stimulation on language abilities in early rehabilitation of post-stroke aphasic patients. *Neurologia i neurochirurgia polska* 2013;**47**:414-22. 37
29. Prins RS, Schoonen R, Vermeulen J. Efficacy of Two Different Types of Speech Therapy for Aphasic Stroke Patients. *Applied Psycholinguistics* 1989;**10**:85-123. 32
30. Seniow J, Litwin M, Litwin T, Lesniak M, Czlonkowska A. New approach to the rehabilitation of post-stroke focal cognitive syndrome: effect of levodopa combined with speech and language therapy on functional recovery from aphasia. *Journal of the neurological sciences* 2009;**283**:214-8. 39
31. Shewan CM, Kertesz A. Effects of speech and language treatment on recovery from aphasia. *Brain and Language* 1984;**23**:272-99. 100
32. Sickert A, Anders LC, Münte T, Sailer M. Constraint-induced aphasia therapy following sub-acute stroke: a single-blind, randomised clinical trial of a modified therapy schedule. *Journal of Neurology, Neurosurgery & Psychiatry* 2014;**85**:51-5. 100
33. Spielmann K, Van De Sandt-Koenderman MWME, Ribbers GM. Transcranial direct current stimulation (tDCS) to enhance treatment effects in aphasia. *Archives of Physical Medicine and Rehabilitation* 2014;**95**:e21. 58
34. Tsai PY, Wang CP, Ko JS, Chung YM, Chang YW, Wang JX. The persistent and broadly modulating effect of inhibitory rTMS in nonfluent aphasic patients: a sham-controlled, double-blind study. *Neurorehabilitation and Neural Repair* 2014;**28**:779-87. <http://dx.doi.org/10.1177/1545968314522710> 56
35. Waldowski K, Seniow J, Lesniak M, Iwanski S, Czlonkowska A. Effect of low-frequency repetitive transcranial magnetic stimulation on naming abilities in early-stroke aphasic patients: a prospective, randomized, double-blind sham-controlled study. *Scientific World Journal* 2012;**2012**:518568-. 26
36. Walker-Batson D, Unwin H, Ford J, Curtis S, Porch B. A double-blind controlled study of the use of amphetamine in the treatment of aphasia. *Stroke* 2001;**32**:2093-2098. 21
37. Wang L, Liu SM, Liu M, Li BJ, Hui ZL, Gao X. [Post-stroke speech disorder treated with acupuncture and psychological intervention combined with rehabilitation training: a randomized controlled trial]. *Zhongguo Zhen Jiu* 2011;**31**:481-6. 120
38. Weiduschat N, Thiel A, Rubi-Fessen I, Hartmann A, Kessler J, Merl P, *et al.* Effects of Repetitive Transcranial Magnetic Stimulation in Aphasic Stroke. A Randomized Controlled Pilot Study. *Stroke* 2011;**42**:409-15. 10
39. Wu XJ. Analysis of the effect of "two-step method" on aphasia in patients with acute cerebrovascular disease. *Chinese Journal of Clinical Rehabilitation* 2004;**8**:4422-3. 236

SUPPLEMENTAL MATERIAL - Dosage, intensity and frequency of therapy for aphasia

40. Xie SL, Zhu MG, Zhang XL, Xue ZJ. The role of community nursing in family rehabilitation of stroke patients with impaired spoken language. *Chinese Journal of Clinical Rehabilitation* 2002;**6**:3289. 34
41. Yao J, Xue Y, Li F. Clinical application research on collective language strengthened training in rehabilitation nursing of cerebral apoplexy patients with aphasia. *Chinese Nursing Research* 2005;**19**:482-4. 60
42. Zhang HM. [Clinical treatment of apoplectic aphemia with multi-needle puncture of scalp-points in combination with visual-listening-speech training]. *Zhen ci yan jiu [Acupuncture research]* 2007;**32**:190-4. 36
43. Zhang SH, Lu XM. Nursing care of the patient with cerebral infarction and aphasia receiving carotid internal drug injection and early speech training. *Journal of Nursing Science* 1997;**12**:34-5. 35
44. Zhao C, Zhen Y, Zhang Y. Observations on the effect of acupuncture for treatment of 46 patients with apoplectic aphasia. *Shanghai Journal of Acupuncture and Moxibustion* 2004;**23**:13-4. 81
45. Zhao H, Ying B, Shen C. Clinical Study on the Effect of Combined Therapy of Medicine, Acupuncture and Speech Training on Aphasia from Ischemic Apoplexy. *Henan Traditional Chinese Medicine Henan Zhong yi* 2000;**20**:31-2. 138

---

\* = primary reference identified. Secondary references available on request. IPD = Individual participant data

Fig I. Data searching and identification

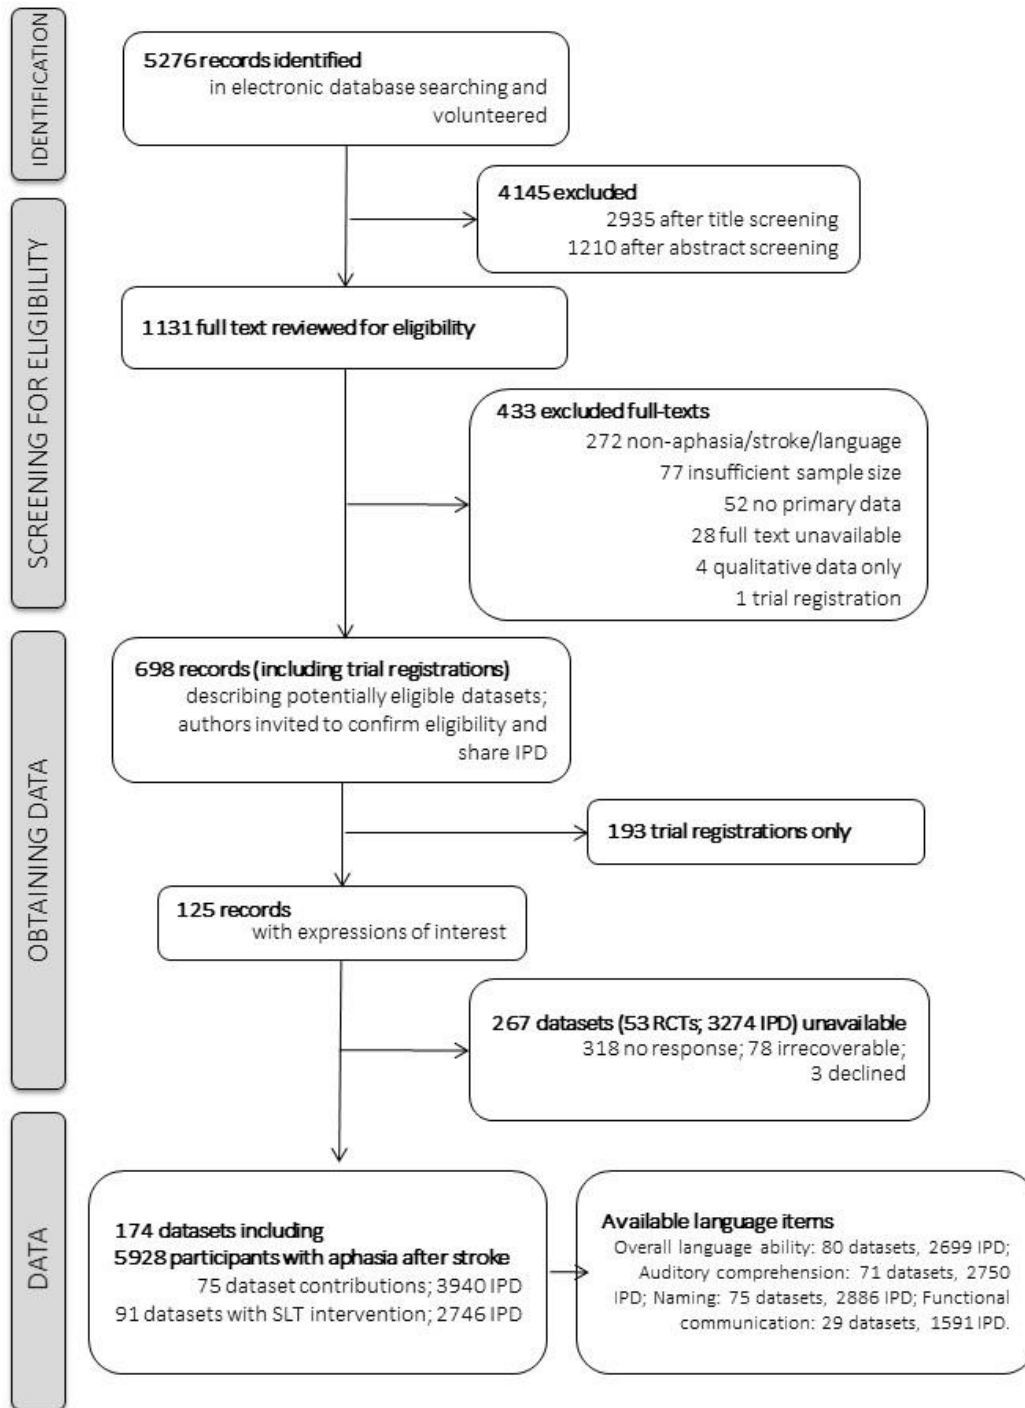



**Fig II. SLT Frequency Networks (days per week)**

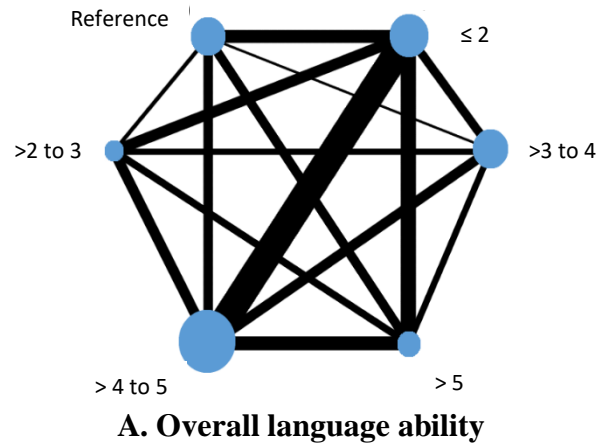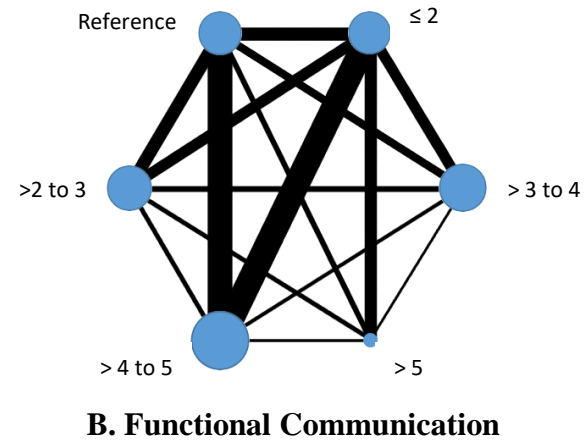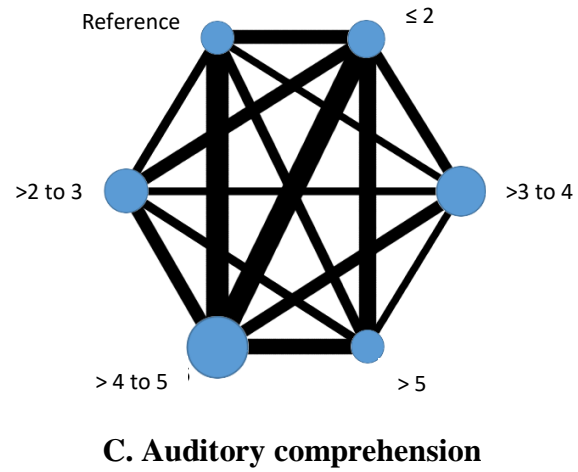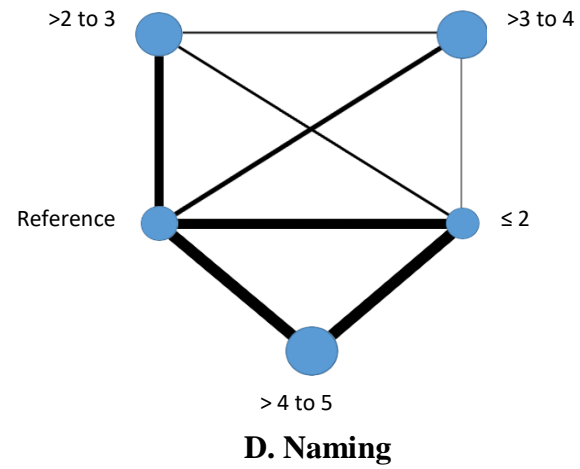

**Fig III. SLT Frequency (by days/weekly) and associated gains from baseline (mean; 95% CI)**

**A. Overall Language - WAB-AQ [0-100]; 482 IPD 11 RCTs)**

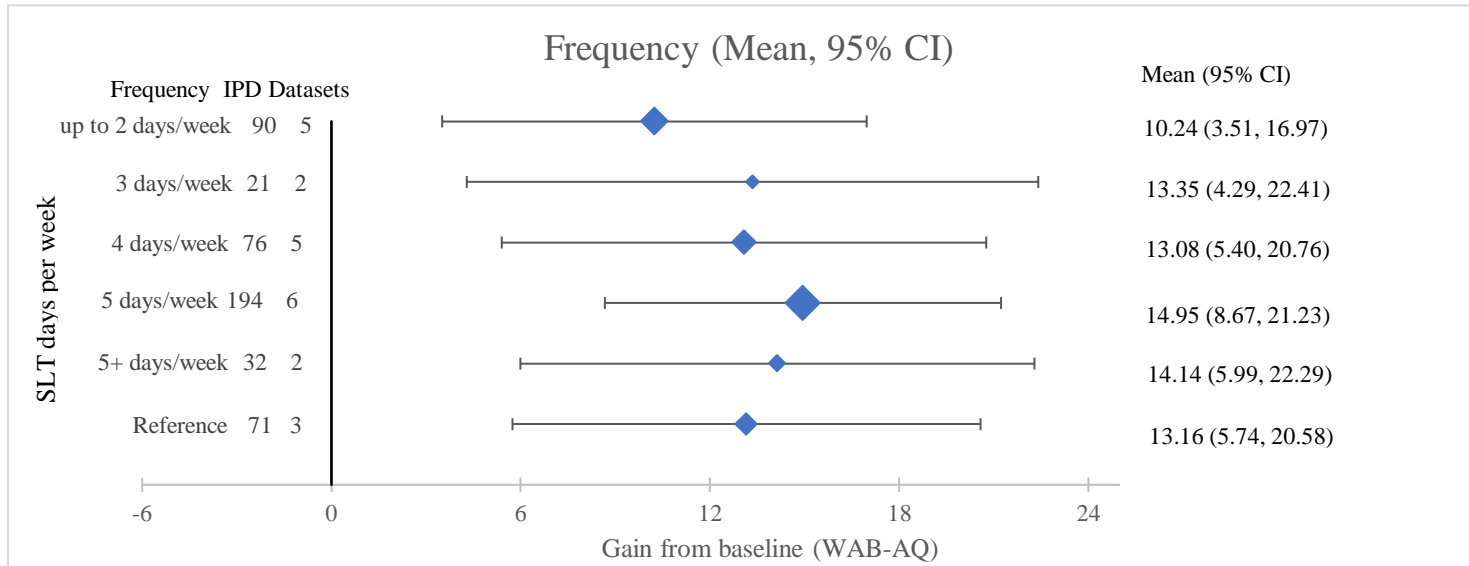

**B. Functional Communication - AAT-SSC [0-5]; 526 IPD (14 RCTs)**

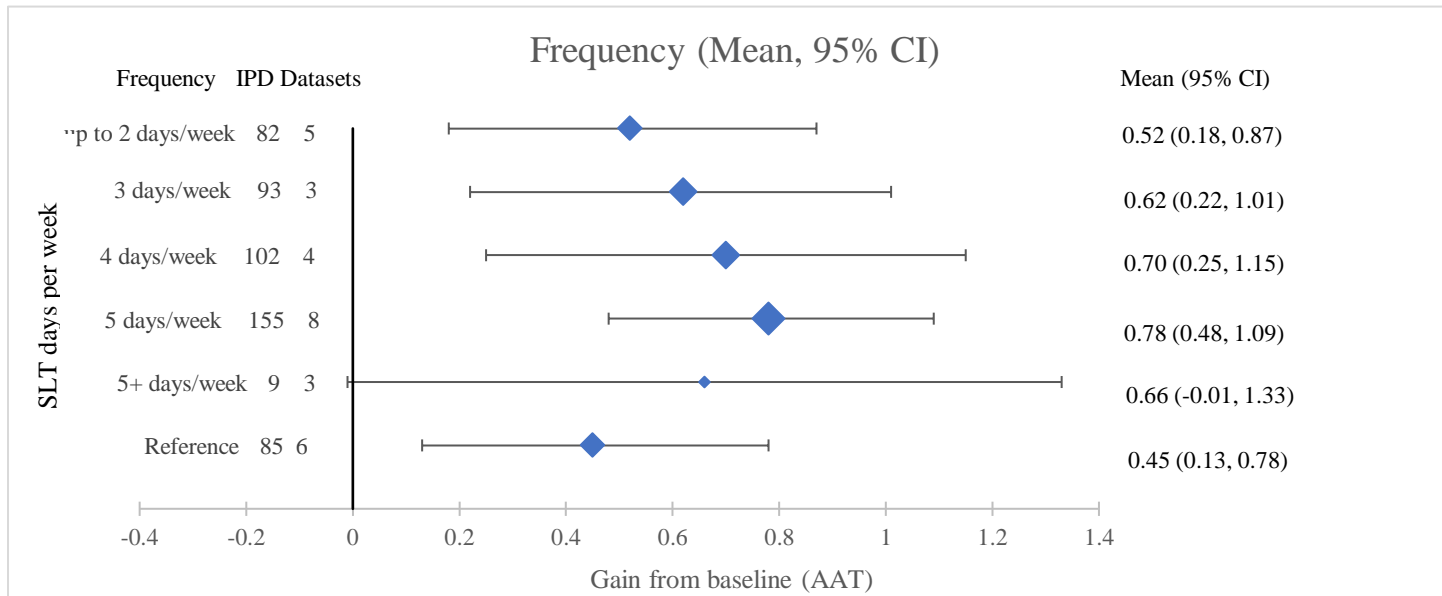

**C. Auditory Comprehension - AAT Token Test [0-50]; 540 IPD (16 RCTs)**

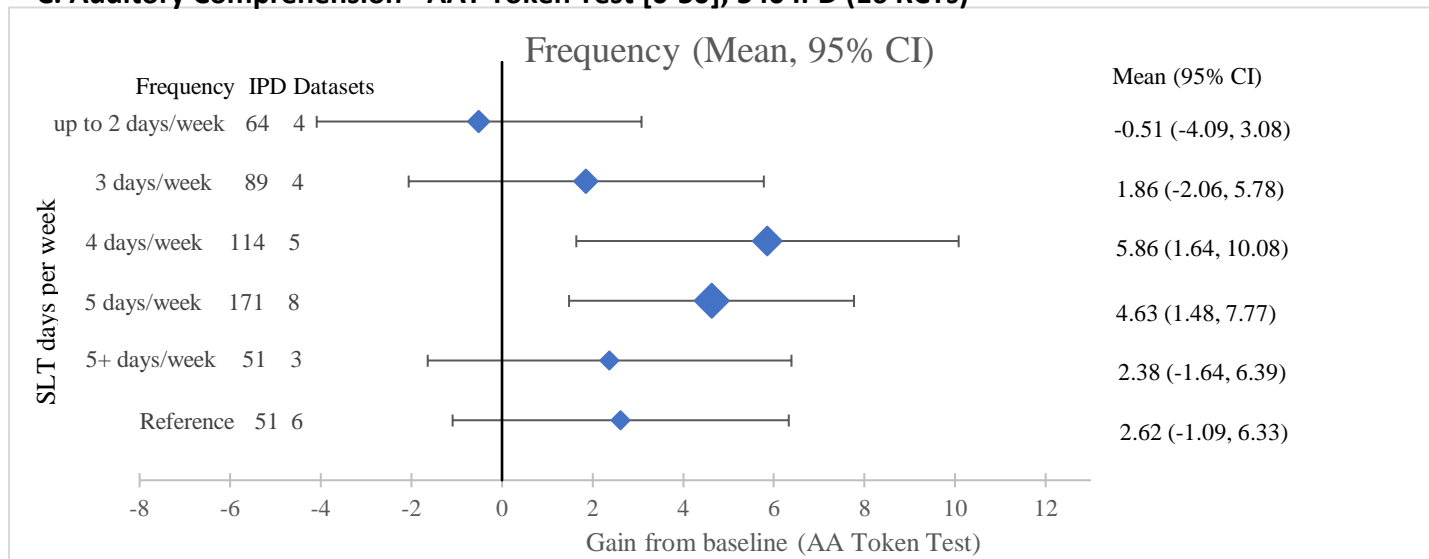

**D. Naming - BNT [0-60]; 385 IPD (RCTs)**

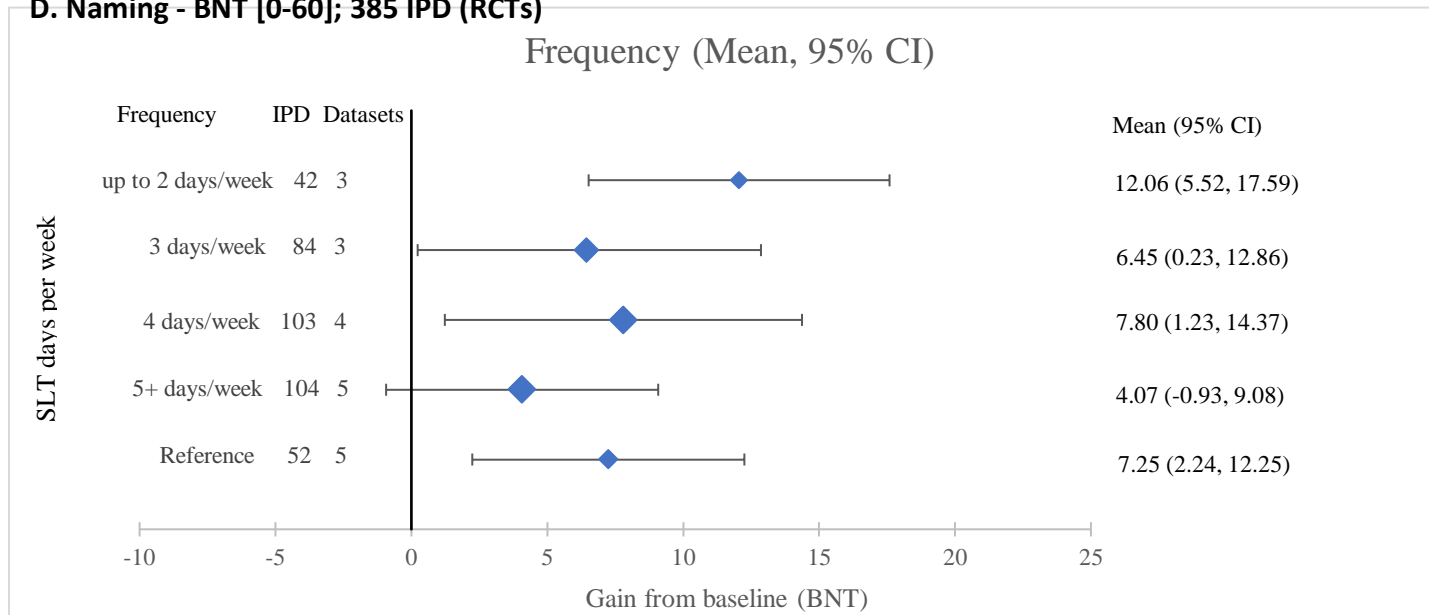

Fig IV. SLT Duration (total weeks) networks

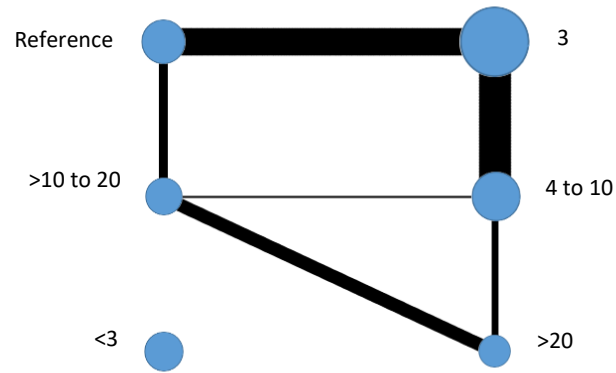

A. Overall language ability

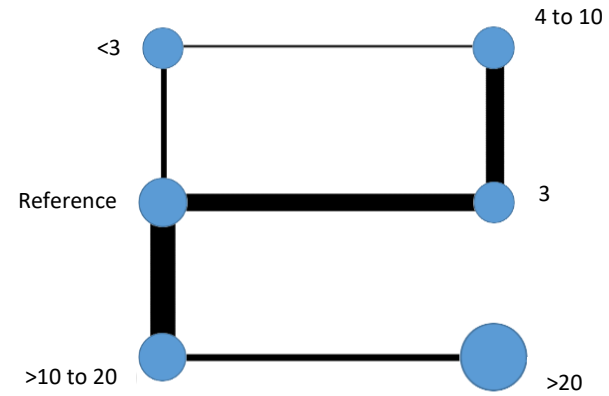

B. Functional communication

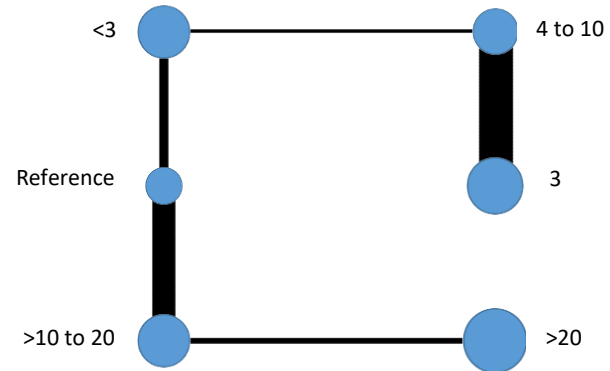

C. Auditory comprehension

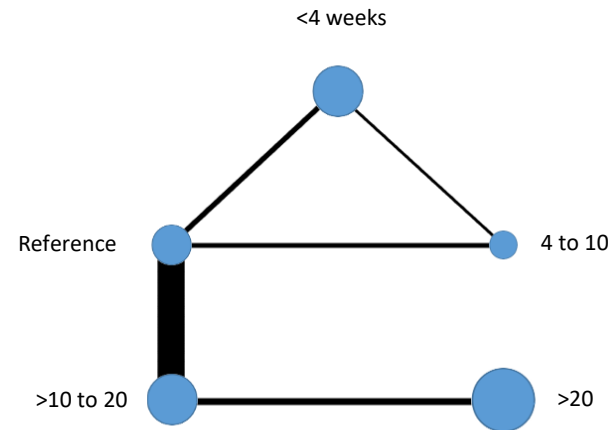

D. Naming

**Fig. V Duration (weeks of SLT) and associated language gains from baseline (mean; 95% CI)**

**A. Overall Language - WAB-AQ [0-100]; 430 IPD (10 RCTs)**

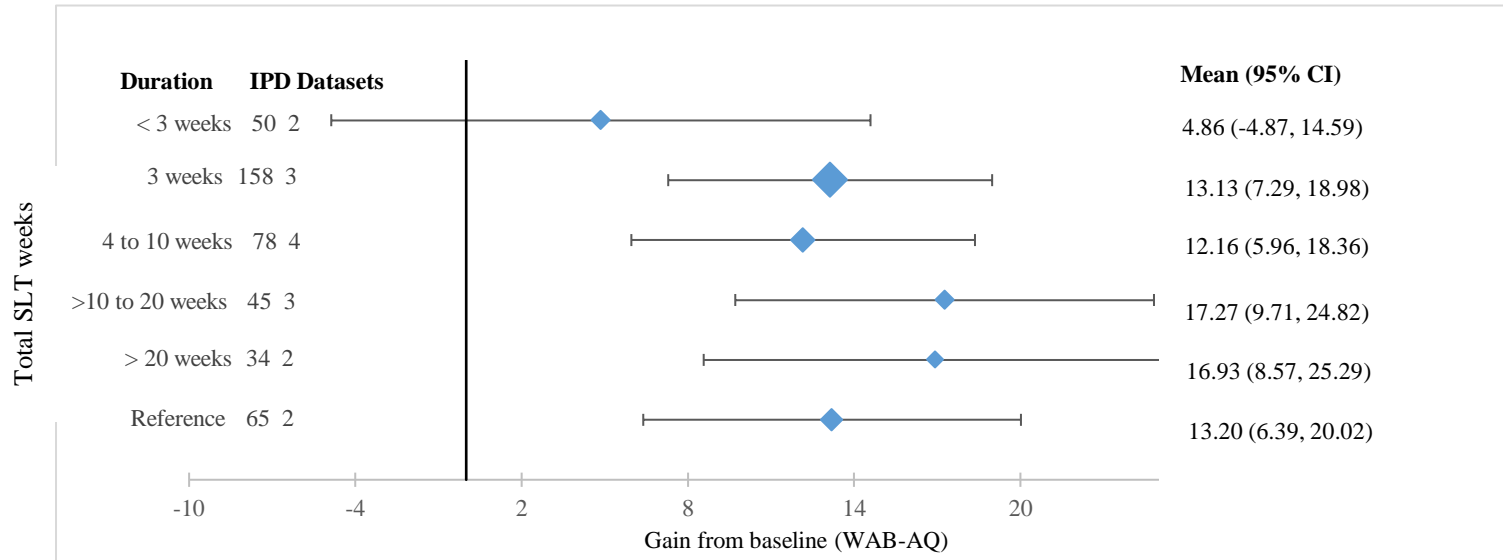

**B. Functional Communication - AAT-SSC [0-5]; 474 IPD (13 RCTs)**

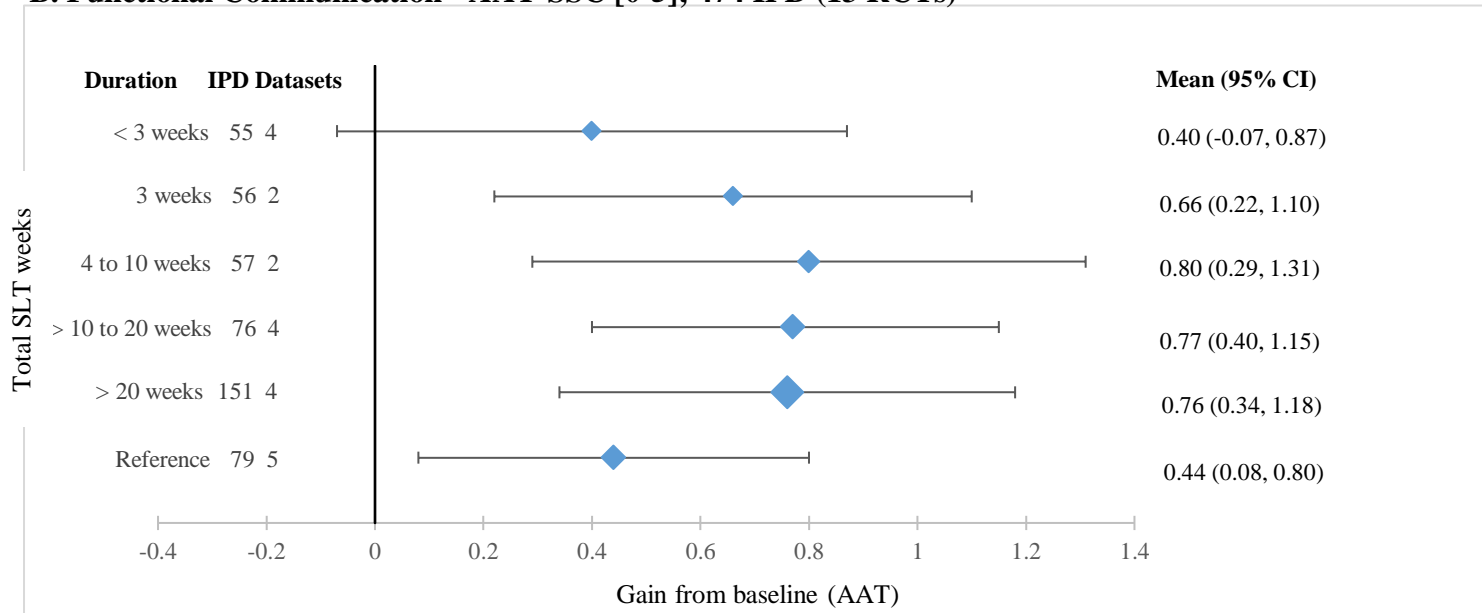

**C. Auditory Comprehension - AAT Token Test [0-50]; 540 IPD (16 RCTs)**

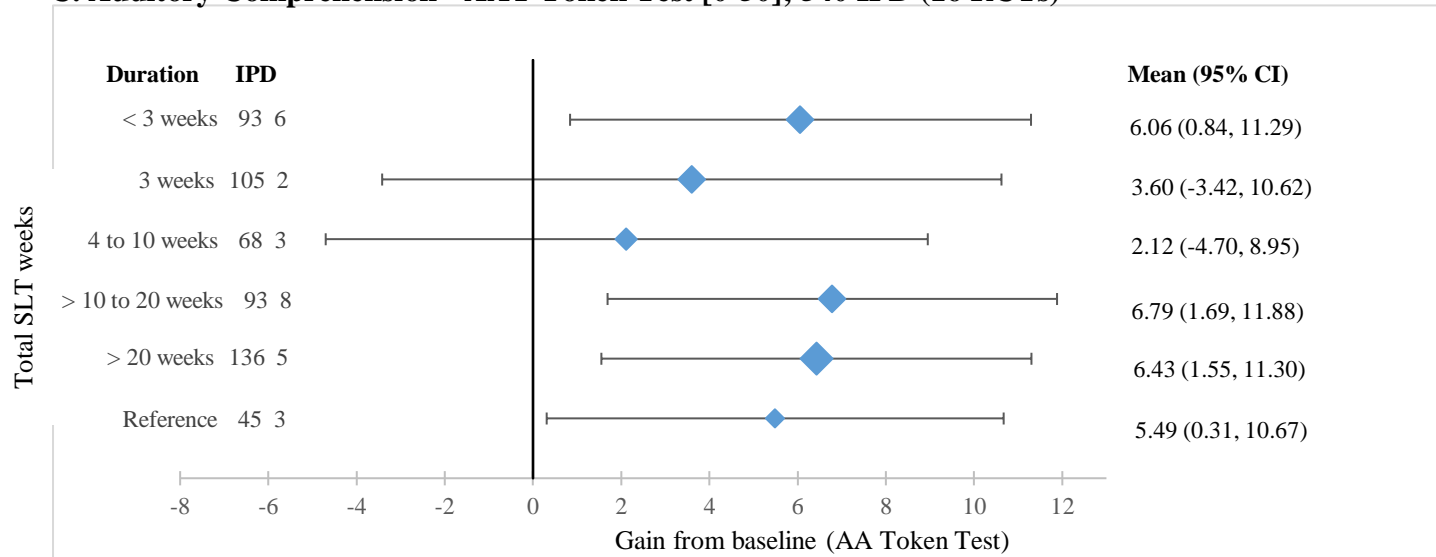

**D. Naming - BNT [0-60]; 385 IPD (13 RCTs)**

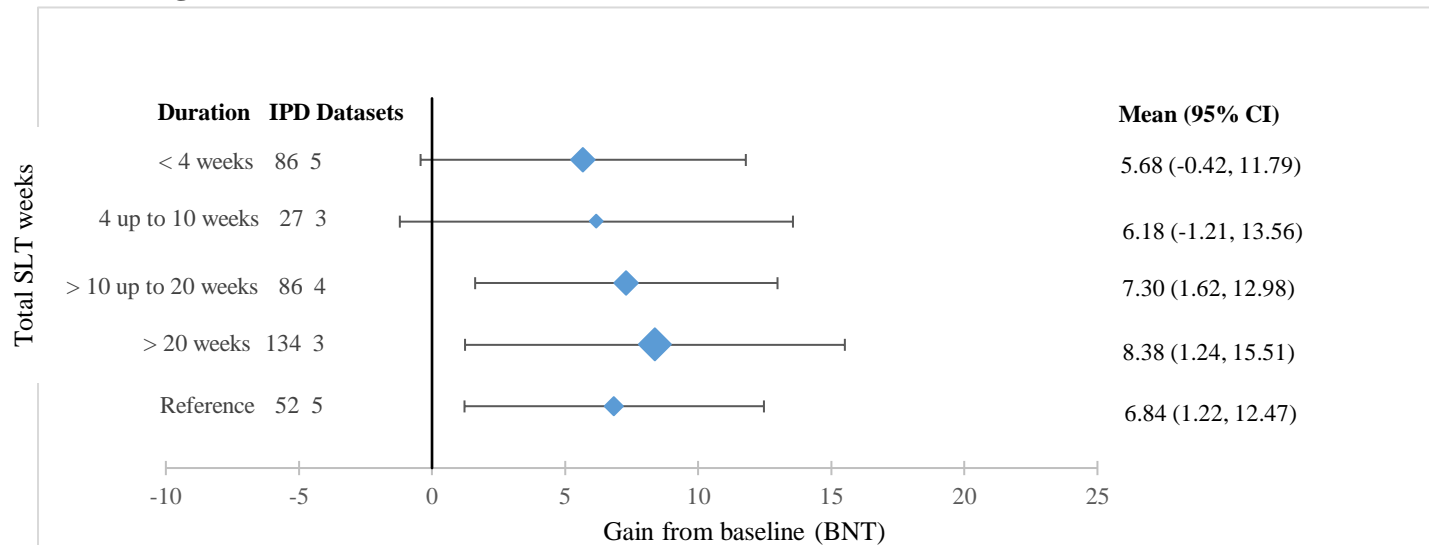

Fig. VI. Risk of bias by RCT dataset

| RCT Dataset            | Random sequence generation (selection bias) | Allocation concealment (selection bias) | Blinding of outcome assessment (detection bias) | Incomplete outcome data (attrition bias) | Other bias |
|------------------------|---------------------------------------------|-----------------------------------------|-------------------------------------------------|------------------------------------------|------------|
| Breitenstein 2015      | +                                           | +                                       | +                                               | +                                        | +          |
| CACTUS                 | +                                           | +                                       | +                                               | +                                        | +          |
| FOETZEC                | +                                           | +                                       | ?                                               | +                                        | +          |
| Khedr 2014             | ?                                           | +                                       | +                                               | +                                        | +          |
| Kukkonen               | +                                           | -                                       | ?                                               | ?                                        | +          |
| Laska 2011             | +                                           | +                                       | +                                               | ?                                        | +          |
| Leff 2017              | +                                           | +                                       | ?                                               | +                                        | ?          |
| LIFT 1 and 2           | -                                           | -                                       | ?                                               | +                                        | +          |
| Lincoln 1980 Dataset 1 | +                                           | ?                                       | +                                               | +                                        | +          |
| Lincoln 1980 Dataset 3 | +                                           | ?                                       | +                                               | +                                        | +          |
| Mattoli 2014           | +                                           | -                                       | +                                               | +                                        | +          |
| Meikle 1979            | ?                                           | ?                                       | ?                                               | +                                        | +          |
| Meinzer 2007           | ?                                           | ?                                       | ?                                               | +                                        | ?          |
| MULTICUE               | +                                           | +                                       | ?                                               | +                                        | +          |
| Papathanasiou 2017     | ?                                           | -                                       | +                                               | +                                        | +          |
| RATS 1                 | +                                           | +                                       | +                                               | ?                                        | +          |
| RATS 2                 | +                                           | +                                       | ?                                               | +                                        | +          |
| Rubi-Fessen 2015       | +                                           | +                                       | +                                               | +                                        | +          |
| Smania 2006            | -                                           | ?                                       | +                                               | +                                        | +          |
| SP+R-IT 2013           | +                                           | +                                       | +                                               | +                                        | +          |
| Szafarski 2015         | ?                                           | +                                       | +                                               | +                                        | +          |
| van der Meulen 2016    | +                                           | +                                       | +                                               | +                                        | +          |
| VERSE 1                | +                                           | +                                       | +                                               | +                                        | ?          |
| VERSE 2                | +                                           | +                                       | +                                               | +                                        | +          |
| You 2011               | ?                                           | ?                                       | +                                               | +                                        | +          |

*SUPPLEMENTAL MATERIAL - Dosage, intensity and frequency of therapy for aphasia*



## PRISMA-IPD Checklist of items to include when reporting a systematic review and meta-analysis of individual participant data (IPD)

| PRISMA-IPD Section/topic  | Item No | Checklist item                                                                                                                                                                                                                                                                                                                                                                                                                                         | Reported on page                                  |
|---------------------------|---------|--------------------------------------------------------------------------------------------------------------------------------------------------------------------------------------------------------------------------------------------------------------------------------------------------------------------------------------------------------------------------------------------------------------------------------------------------------|---------------------------------------------------|
| <b>Title</b>              |         |                                                                                                                                                                                                                                                                                                                                                                                                                                                        |                                                   |
| Title                     | 1       | Identify the report as a systematic review and meta-analysis of individual participant data.                                                                                                                                                                                                                                                                                                                                                           | 1                                                 |
| <b>Abstract</b>           |         |                                                                                                                                                                                                                                                                                                                                                                                                                                                        |                                                   |
| Structured summary        | 2       | Provide a structured summary including as applicable:                                                                                                                                                                                                                                                                                                                                                                                                  | 2-3<br><br>(Registration page 3; funding page 19) |
|                           |         | <b>Background:</b> state research question and main objectives, with information on participants, interventions, comparators and outcomes.                                                                                                                                                                                                                                                                                                             |                                                   |
|                           |         | <b>Methods:</b> report eligibility criteria; data sources including dates of last bibliographic search or elicitation, noting that IPD were sought; methods of assessing risk of bias.                                                                                                                                                                                                                                                                 |                                                   |
|                           |         | <b>Results:</b> provide number and type of studies and participants identified and number (%) obtained; summary effect estimates for main outcomes (benefits and harms) with confidence intervals and measures of statistical heterogeneity. Describe the direction and size of summary effects in terms meaningful to those who would put findings into practice.                                                                                     |                                                   |
|                           |         | <b>Discussion:</b> state main strengths and limitations of the evidence, general interpretation of the results and any important implications.                                                                                                                                                                                                                                                                                                         |                                                   |
|                           |         | <b>Other:</b> report primary funding source, registration number and registry name for the systematic review and IPD meta-analysis.                                                                                                                                                                                                                                                                                                                    |                                                   |
| <b>Introduction</b>       |         |                                                                                                                                                                                                                                                                                                                                                                                                                                                        |                                                   |
| Rationale                 | 3       | Describe the rationale for the review in the context of what is already known.                                                                                                                                                                                                                                                                                                                                                                         | 5-6                                               |
| Objectives                | 4       | Provide an explicit statement of the questions being addressed with reference, as applicable, to participants, interventions, comparisons, outcomes and study design (PICOS). Include any hypotheses that relate to particular types of participant-level subgroups.                                                                                                                                                                                   | 6                                                 |
| <b>Methods</b>            |         |                                                                                                                                                                                                                                                                                                                                                                                                                                                        |                                                   |
| Protocol and registration | 5       | Indicate if a protocol exists and where it can be accessed. If available, provide registration information including registration number and registry name. Provide publication details, if applicable.                                                                                                                                                                                                                                                | Several mentions but first on pages 3 & 7         |
| Eligibility criteria      | 6       | Specify inclusion and exclusion criteria including those relating to participants, interventions, comparisons, outcomes, study design and characteristics (e.g. years when conducted, required minimum follow-up). Note whether these were applied at the study or individual level i.e. whether eligible participants were included (and ineligible participants excluded) from a study that included a wider population than specified by the review | 6-7                                               |

|                                                |    |                                                                                                                                                                                                                                                                                                                                                                                                                                         |                                                                                                |
|------------------------------------------------|----|-----------------------------------------------------------------------------------------------------------------------------------------------------------------------------------------------------------------------------------------------------------------------------------------------------------------------------------------------------------------------------------------------------------------------------------------|------------------------------------------------------------------------------------------------|
|                                                |    | inclusion criteria. The rationale for criteria should be stated.                                                                                                                                                                                                                                                                                                                                                                        |                                                                                                |
| Identifying studies - information sources      | 7  | Describe all methods of identifying published and unpublished studies including, as applicable: which bibliographic databases were searched with dates of coverage; details of any hand searching including of conference proceedings; use of study registers and agency or company databases; contact with the original research team and experts in the field; open adverts and surveys. Give the date of last search or elicitation. | pages 2, 7 and in cited protocol publication Ref 18 and                                        |
| Identifying studies - search                   | 8  | Present the full electronic search strategy for at least one database, including any limits used, such that it could be repeated.                                                                                                                                                                                                                                                                                                       | In cited protocol publication Ref 18                                                           |
| Study selection processes                      | 9  | State the process for determining which studies were eligible for inclusion.                                                                                                                                                                                                                                                                                                                                                            | pages 2, 7-8 and in more detail in cited protocol publication Ref 18                           |
| Data collection processes                      | 10 | Describe how IPD were requested, collected and managed, including any processes for querying and confirming data with investigators. If IPD were not sought from any eligible study, the reason for this should be stated (for each such study).                                                                                                                                                                                        | pages 7-8 and in more detail in cited protocol publication Ref 18 and supplementary materials. |
|                                                |    | If applicable, describe how any studies for which IPD were not available were dealt with. This should include whether, how and what aggregate data were sought or extracted from study reports and publications (such as extracting data independently in duplicate) and any processes for obtaining and confirming these data with investigators.                                                                                      |                                                                                                |
| Data items                                     | 11 | Describe how the information and variables to be collected were chosen. List and define all study level and participant level data that were sought, including baseline and follow-up information. If applicable, describe methods of standardising or translating variables within the IPD datasets to ensure common scales or measurements across studies.                                                                            | pages 7-8 and in more detail in cited protocol publication Ref 18                              |
| IPD integrity                                  | A1 | Describe what aspects of IPD were subject to data checking (such as sequence generation, data consistency and completeness, baseline imbalance) and how this was done.                                                                                                                                                                                                                                                                  | pages 8-10 and in more detail in cited protocol publication Ref 18                             |
| Risk of bias assessment in individual studies. | 12 | Describe methods used to assess risk of bias in the individual studies and whether this was applied separately for each outcome. If applicable, describe how findings of IPD checking were used to inform the assessment. Report if and how risk of bias assessment was used in any data synthesis.                                                                                                                                     | 10-11                                                                                          |
| Specification of outcomes and effect measures  | 13 | State all treatment comparisons of interests. State all outcomes addressed and define them in detail. State whether they were pre-specified for the review and, if applicable, whether they were primary/main or secondary/additional outcomes. Give the principal measures of effect (such as risk ratio, hazard ratio, difference in means) used for each outcome.                                                                    | 2, 7-9                                                                                         |
| Synthesis                                      | 14 | Describe the meta-analysis methods used to synthesise IPD. Specify any statistical methods and models used. Issues should include (but are not restricted to):                                                                                                                                                                                                                                                                          | 9-10                                                                                           |

|                                     |    |                                                                                                                                                                                                                                                                                                                                                                                                                                                                                                                                                                                                                                                                                                                                                                                                                                                                    |                                                                                                    |
|-------------------------------------|----|--------------------------------------------------------------------------------------------------------------------------------------------------------------------------------------------------------------------------------------------------------------------------------------------------------------------------------------------------------------------------------------------------------------------------------------------------------------------------------------------------------------------------------------------------------------------------------------------------------------------------------------------------------------------------------------------------------------------------------------------------------------------------------------------------------------------------------------------------------------------|----------------------------------------------------------------------------------------------------|
| methods                             |    | <ul style="list-style-type: none"> <li>• Use of a one-stage or two-stage approach.</li> <li>• How effect estimates were generated separately within each study and combined across studies (where applicable).</li> <li>• Specification of one-stage models (where applicable) including how clustering of patients within studies was accounted for.</li> <li>• Use of fixed or random effects models and any other model assumptions, such as proportional hazards.</li> <li>• How (summary) survival curves were generated (where applicable).</li> <li>• Methods for quantifying statistical heterogeneity (such as <math>I^2</math> and <math>\tau^2</math>).</li> <li>• How studies providing IPD and not providing IPD were analysed together (where applicable).</li> <li>• How missing data within the IPD were dealt with (where applicable).</li> </ul> |                                                                                                    |
| Exploration of variation in effects | A2 | If applicable, describe any methods used to explore variation in effects by study or participant level characteristics (such as estimation of interactions between effect and covariates). State all participant-level characteristics that were analysed as potential effect modifiers, and whether these were pre-specified.                                                                                                                                                                                                                                                                                                                                                                                                                                                                                                                                     | 10                                                                                                 |
| Risk of bias across studies         | 15 | Specify any assessment of risk of bias relating to the accumulated body of evidence, including any pertaining to not obtaining IPD for particular studies, outcomes or other variables.                                                                                                                                                                                                                                                                                                                                                                                                                                                                                                                                                                                                                                                                            | 10-11                                                                                              |
| Additional analyses                 | 16 | Describe methods of any additional analyses, including sensitivity analyses. State which of these were pre-specified.                                                                                                                                                                                                                                                                                                                                                                                                                                                                                                                                                                                                                                                                                                                                              | 9-11                                                                                               |
| <b>Results</b>                      |    |                                                                                                                                                                                                                                                                                                                                                                                                                                                                                                                                                                                                                                                                                                                                                                                                                                                                    |                                                                                                    |
| Study selection and IPD obtained    | 17 | Give numbers of studies screened, assessed for eligibility, and included in the systematic review with reasons for exclusions at each stage. Indicate the number of studies and participants for which IPD were sought and for which IPD were obtained. For those studies where IPD were not available, give the numbers of studies and participants for which aggregate data were available. Report reasons for non-availability of IPD. Include a flow diagram.                                                                                                                                                                                                                                                                                                                                                                                                  | Fig 1, Supplementary Materials (Fig I) and reported in more detail in cited companion paper Ref 18 |
| Study characteristics               | 18 | For each study, present information on key study and participant characteristics (such as description of interventions, numbers of participants, demographic data, unavailability of outcomes, funding source, and if applicable duration of follow-up). Provide (main) citations for each study. Where applicable, also report similar study characteristics for any studies not providing IPD.                                                                                                                                                                                                                                                                                                                                                                                                                                                                   | Supplementary Materials and pages 20-29 for citations for each study included.                     |
| IPD integrity                       | A3 | Report any important issues identified in checking IPD or state that there were none.                                                                                                                                                                                                                                                                                                                                                                                                                                                                                                                                                                                                                                                                                                                                                                              | 11                                                                                                 |
| Risk of bias within studies         | 19 | Present data on risk of bias assessments. If applicable, describe whether data checking led to the up-weighting or down-weighting of these assessments. Consider how any potential bias impacts on the robustness of meta-analysis conclusions.                                                                                                                                                                                                                                                                                                                                                                                                                                                                                                                                                                                                                    | 15 and Supplementary Materials                                                                     |
| Results of individual               | 20 | For each comparison and for each main outcome (benefit or harm), for each individual study report the number of eligible participants for which data were obtained and show simple summary data for each intervention group (including, where applicable, the number of events), effect estimates and confidence intervals. These may be                                                                                                                                                                                                                                                                                                                                                                                                                                                                                                                           | Figs 1-5 network diagrams and plots in Supplementary Materials                                     |

|                             |    |                                                                                                                                                                                                                                                                                                                                         |                                                                                                   |
|-----------------------------|----|-----------------------------------------------------------------------------------------------------------------------------------------------------------------------------------------------------------------------------------------------------------------------------------------------------------------------------------------|---------------------------------------------------------------------------------------------------|
| studies                     |    | tabulated or included on a forest plot.                                                                                                                                                                                                                                                                                                 | and includes overview of each study IPD contribution to the study.                                |
| Results of syntheses        | 21 | Present summary effects for each meta-analysis undertaken, including confidence intervals and measures of statistical heterogeneity. State whether the analysis was pre-specified, and report the numbers of studies and participants and, where applicable, the number of events on which it is based.                                 | 12-15<br><br>Figs 1-5 network diagrams and plots with additional items in Supplementary materials |
|                             |    | When exploring variation in effects due to patient or study characteristics, present summary interaction estimates for each characteristic examined, including confidence intervals and measures of statistical heterogeneity. State whether the analysis was pre-specified. State whether any interaction is consistent across trials. |                                                                                                   |
|                             |    | Provide a description of the direction and size of effect in terms meaningful to those who would put findings into practice.                                                                                                                                                                                                            |                                                                                                   |
| Risk of bias across studies | 22 | Present results of any assessment of risk of bias relating to the accumulated body of evidence, including any pertaining to the availability and representativeness of available studies, outcomes or other variables.                                                                                                                  | 15                                                                                                |
| Additional analyses         | 23 | Give results of any additional analyses (e.g. sensitivity analyses). If applicable, this should also include any analyses that incorporate aggregate data for studies that do not have IPD. If applicable, summarise the main meta-analysis results following the inclusion or exclusion of studies for which IPD were not available.   | 17 and reported separately (manuscript submitted)                                                 |
| <b>Discussion</b>           |    |                                                                                                                                                                                                                                                                                                                                         |                                                                                                   |
| Summary of evidence         | 24 | Summarise the main findings, including the strength of evidence for each main outcome.                                                                                                                                                                                                                                                  | 15-17                                                                                             |
| Strengths and limitations   | 25 | Discuss any important strengths and limitations of the evidence including the benefits of access to IPD and any limitations arising from IPD that were not available.                                                                                                                                                                   | 16-17                                                                                             |
| Conclusions                 | 26 | Provide a general interpretation of the findings in the context of other evidence.                                                                                                                                                                                                                                                      | 17-18                                                                                             |
| Implications                | A4 | Consider relevance to key groups (such as policy makers, service providers and service users). Consider implications for future research.                                                                                                                                                                                               | 17-18                                                                                             |
| <b>Funding</b>              |    |                                                                                                                                                                                                                                                                                                                                         |                                                                                                   |
| Funding                     | 27 | Describe sources of funding and other support (such as supply of IPD), and the role in the systematic review of those providing such support.                                                                                                                                                                                           | 19                                                                                                |

**A1 – A3 denote new items that are additional to standard PRISMA items. A4 has been created as a result of re-arranging content of the standard PRISMA statement to suit the way that systematic review IPD meta-analyses are reported.**

© Reproduced with permission of the PRISMA IPD Group, which encourages sharing and reuse for non-commercial purposes
